# Supplementary material for: The Transcriptome of the Reference Potato Genome Solanum tuberosum Group Phureja Clone DM1-3 516R44
Source: PLoS One. 2011 Oct 28;6(10):e26801. doi: 10.1371/journal.pone.0026801 (PMC3203163; doi:10.1371/journal.pone.0026801)
Supplement: Table S1 — List of high-confidence transcripts detected in 32 tissues with corresponding gene and peptide IDs. (XLS) [file pone.0026801.s002.xls]

## Sheet: Sheet1
Table S1. List of high-confidence transcripts detected in 32 tissues with corresponding gene and peptide IDs
Transcript_ID	Gene_ID	Peptide_ID
PGSC0003DMT400000002	PGSC0003DMG400000001	PGSC0003DMP400000002
PGSC0003DMT400000004	PGSC0003DMG400000002	PGSC0003DMP400000004
PGSC0003DMT400000009	PGSC0003DMG400000003	PGSC0003DMP400000009
PGSC0003DMT400000010	PGSC0003DMG400000004	PGSC0003DMP400000010
PGSC0003DMT400000012	PGSC0003DMG400000005	PGSC0003DMP400000012
PGSC0003DMT400000016	PGSC0003DMG401000006	PGSC0003DMP400000016
PGSC0003DMT400000019	PGSC0003DMG402000006	PGSC0003DMP400000018
PGSC0003DMT400000024	PGSC0003DMG401000007	PGSC0003DMP400000023
PGSC0003DMT400000025	PGSC0003DMG402000007	PGSC0003DMP400000024
PGSC0003DMT400000028	PGSC0003DMG400000008	PGSC0003DMP400000027
PGSC0003DMT400000030	PGSC0003DMG400000009	PGSC0003DMP400000029
PGSC0003DMT400000034	PGSC0003DMG400000010	PGSC0003DMP400000033
PGSC0003DMT400000036	PGSC0003DMG400000011	PGSC0003DMP400000035
PGSC0003DMT400000041	PGSC0003DMG400000012	PGSC0003DMP400000038
PGSC0003DMT400000042	PGSC0003DMG400000013	PGSC0003DMP400000039
PGSC0003DMT400000043	PGSC0003DMG400000014	PGSC0003DMP400000040
PGSC0003DMT400000051	PGSC0003DMG400000016	PGSC0003DMP400000045
PGSC0003DMT400000054	PGSC0003DMG400000017	PGSC0003DMP400000046
PGSC0003DMT400000063	PGSC0003DMG401000019	PGSC0003DMP400000055
PGSC0003DMT400000064	PGSC0003DMG402000019	PGSC0003DMP400000056
PGSC0003DMT400000066	PGSC0003DMG401000020	PGSC0003DMP400000058
PGSC0003DMT400000067	PGSC0003DMG402000020	PGSC0003DMP400000059
PGSC0003DMT400000078	PGSC0003DMG400000021	PGSC0003DMP400000066
PGSC0003DMT400000080	PGSC0003DMG400000022	PGSC0003DMP400000068
PGSC0003DMT400000086	PGSC0003DMG400000024	PGSC0003DMP400000070
PGSC0003DMT400000089	PGSC0003DMG400000025	PGSC0003DMP400000071
PGSC0003DMT400000107	PGSC0003DMG402000029	PGSC0003DMP400000080
PGSC0003DMT400000108	PGSC0003DMG401000029	PGSC0003DMP400000081
PGSC0003DMT400000116	PGSC0003DMG400000031	PGSC0003DMP400000087
PGSC0003DMT400000126	PGSC0003DMG400000036	PGSC0003DMP400000093
PGSC0003DMT400000129	PGSC0003DMG400000037	PGSC0003DMP400000095
PGSC0003DMT400000130	PGSC0003DMG400000038	PGSC0003DMP400000096
PGSC0003DMT400000136	PGSC0003DMG400000040	PGSC0003DMP400000102
PGSC0003DMT400000143	PGSC0003DMG400000042	PGSC0003DMP400000106
PGSC0003DMT400000146	PGSC0003DMG400000043	PGSC0003DMP400000107
PGSC0003DMT400000151	PGSC0003DMG400000045	PGSC0003DMP400000112
PGSC0003DMT400000152	PGSC0003DMG400000046	PGSC0003DMP400000113
PGSC0003DMT400000154	PGSC0003DMG400000047	PGSC0003DMP400000115
PGSC0003DMT400000156	PGSC0003DMG400000048	PGSC0003DMP400000117
PGSC0003DMT400000163	PGSC0003DMG400000050	PGSC0003DMP400000123
PGSC0003DMT400000167	PGSC0003DMG401000051	PGSC0003DMP400000126
PGSC0003DMT400000170	PGSC0003DMG402000051	PGSC0003DMP400000127
PGSC0003DMT400000176	PGSC0003DMG400000053	PGSC0003DMP400000130
PGSC0003DMT400000186	PGSC0003DMG401000056	PGSC0003DMP400000138
PGSC0003DMT400000189	PGSC0003DMG402000056	PGSC0003DMP400000141
PGSC0003DMT400000192	PGSC0003DMG401000057	PGSC0003DMP400000144
PGSC0003DMT400000194	PGSC0003DMG402000057	PGSC0003DMP400000145
PGSC0003DMT400000205	PGSC0003DMG400000060	PGSC0003DMP400000149
PGSC0003DMT400000210	PGSC0003DMG400000062	PGSC0003DMP400000151
PGSC0003DMT400000212	PGSC0003DMG400000063	PGSC0003DMP400000153
PGSC0003DMT400000215	PGSC0003DMG400000064	PGSC0003DMP400000156
PGSC0003DMT400000218	PGSC0003DMG400000065	PGSC0003DMP400000159
PGSC0003DMT400000220	PGSC0003DMG400000066	PGSC0003DMP400000161
PGSC0003DMT400000222	PGSC0003DMG400000067	PGSC0003DMP400000163
PGSC0003DMT400000226	PGSC0003DMG400000069	PGSC0003DMP400000166
PGSC0003DMT400000227	PGSC0003DMG400000070	PGSC0003DMP400000167
PGSC0003DMT400000230	PGSC0003DMG400000072	PGSC0003DMP400000170
PGSC0003DMT400000233	PGSC0003DMG400000073	PGSC0003DMP400000173
PGSC0003DMT400000235	PGSC0003DMG400000075	PGSC0003DMP400000175
PGSC0003DMT400000237	PGSC0003DMG401000076	PGSC0003DMP400000177
PGSC0003DMT400000240	PGSC0003DMG402000076	PGSC0003DMP400000180
PGSC0003DMT400000241	PGSC0003DMG400000077	PGSC0003DMP400000181
PGSC0003DMT400000243	PGSC0003DMG400000078	PGSC0003DMP400000183
PGSC0003DMT400000247	PGSC0003DMG400000079	PGSC0003DMP400000187
PGSC0003DMT400000249	PGSC0003DMG400000080	PGSC0003DMP400000188
PGSC0003DMT400000251	PGSC0003DMG400000081	PGSC0003DMP400000190
PGSC0003DMT400000254	PGSC0003DMG401000083	PGSC0003DMP400000192
PGSC0003DMT400000256	PGSC0003DMG402000083	PGSC0003DMP400000193
PGSC0003DMT400000259	PGSC0003DMG400000084	PGSC0003DMP400000194
PGSC0003DMT400000261	PGSC0003DMG400000085	PGSC0003DMP400000196
PGSC0003DMT400000264	PGSC0003DMG400000086	PGSC0003DMP400000199
PGSC0003DMT400000265	PGSC0003DMG400000087	PGSC0003DMP400000200
PGSC0003DMT400000266	PGSC0003DMG400000088	PGSC0003DMP400000201
PGSC0003DMT400000269	PGSC0003DMG400000089	PGSC0003DMP400000203
PGSC0003DMT400000273	PGSC0003DMG400000090	PGSC0003DMP400000206
PGSC0003DMT400000274	PGSC0003DMG400000091	PGSC0003DMP400000207
PGSC0003DMT400000276	PGSC0003DMG400000092	PGSC0003DMP400000209
PGSC0003DMT400000279	PGSC0003DMG400000093	PGSC0003DMP400000212
PGSC0003DMT400000281	PGSC0003DMG401000094	PGSC0003DMP400000213
PGSC0003DMT400000283	PGSC0003DMG401000095	PGSC0003DMP400000215
PGSC0003DMT400000286	PGSC0003DMG402000095	PGSC0003DMP400000218
PGSC0003DMT400000290	PGSC0003DMG401000097	PGSC0003DMP400000220
PGSC0003DMT400000291	PGSC0003DMG402000097	PGSC0003DMP400000221
PGSC0003DMT400000293	PGSC0003DMG400000098	PGSC0003DMP400000222
PGSC0003DMT400000295	PGSC0003DMG400000099	PGSC0003DMP400000224
PGSC0003DMT400000299	PGSC0003DMG402000100	PGSC0003DMP400000228
PGSC0003DMT400000301	PGSC0003DMG400000101	PGSC0003DMP400000230
PGSC0003DMT400000310	PGSC0003DMG400000104	PGSC0003DMP400000236
PGSC0003DMT400000311	PGSC0003DMG401000105	PGSC0003DMP400000237
PGSC0003DMT400000313	PGSC0003DMG402000105	PGSC0003DMP400000238
PGSC0003DMT400000320	PGSC0003DMG400000108	PGSC0003DMP400000242
PGSC0003DMT400000326	PGSC0003DMG400000110	PGSC0003DMP400000246
PGSC0003DMT400000330	PGSC0003DMG401000111	PGSC0003DMP400000248
PGSC0003DMT400000331	PGSC0003DMG402000111	PGSC0003DMP400000249
PGSC0003DMT400000333	PGSC0003DMG400000112	PGSC0003DMP400000251
PGSC0003DMT400000335	PGSC0003DMG400000113	PGSC0003DMP400000253
PGSC0003DMT400000336	PGSC0003DMG400000114	PGSC0003DMP400000254
PGSC0003DMT400000338	PGSC0003DMG400000115	PGSC0003DMP400000256
PGSC0003DMT400000339	PGSC0003DMG400000116	PGSC0003DMP400000257
PGSC0003DMT400000342	PGSC0003DMG401000117	PGSC0003DMP400000259
PGSC0003DMT400000343	PGSC0003DMG402000117	PGSC0003DMP400000260
PGSC0003DMT400000345	PGSC0003DMG400000118	PGSC0003DMP400000262
PGSC0003DMT400000347	PGSC0003DMG400000119	PGSC0003DMP400000264
PGSC0003DMT400000349	PGSC0003DMG400000120	PGSC0003DMP400000266
PGSC0003DMT400000351	PGSC0003DMG400000122	PGSC0003DMP400000268
PGSC0003DMT400000352	PGSC0003DMG400000123	PGSC0003DMP400000269
PGSC0003DMT400000356	PGSC0003DMG400000124	PGSC0003DMP400000271
PGSC0003DMT400000359	PGSC0003DMG400000125	PGSC0003DMP400000273
PGSC0003DMT400000360	PGSC0003DMG400000126	PGSC0003DMP400000274
PGSC0003DMT400000363	PGSC0003DMG400000127	PGSC0003DMP400000277
PGSC0003DMT400000364	PGSC0003DMG400000128	PGSC0003DMP400000278
PGSC0003DMT400000365	PGSC0003DMG400000129	PGSC0003DMP400000279
PGSC0003DMT400000367	PGSC0003DMG400000130	PGSC0003DMP400000281
PGSC0003DMT400000376	PGSC0003DMG400000131	PGSC0003DMP400000290
PGSC0003DMT400000377	PGSC0003DMG400000132	PGSC0003DMP400000291
PGSC0003DMT400000378	PGSC0003DMG400000133	PGSC0003DMP400000292
PGSC0003DMT400000380	PGSC0003DMG400000134	PGSC0003DMP400000294
PGSC0003DMT400000383	PGSC0003DMG400000136	PGSC0003DMP400000297
PGSC0003DMT400000387	PGSC0003DMG400000138	PGSC0003DMP400000301
PGSC0003DMT400000390	PGSC0003DMG400000139	PGSC0003DMP400000303
PGSC0003DMT400000391	PGSC0003DMG400000140	PGSC0003DMP400000304
PGSC0003DMT400000396	PGSC0003DMG400000142	PGSC0003DMP400000309
PGSC0003DMT400000423	PGSC0003DMG400000146	PGSC0003DMP400000325
PGSC0003DMT400000436	PGSC0003DMG400000149	PGSC0003DMP400000328
PGSC0003DMT400000446	PGSC0003DMG400000151	PGSC0003DMP400000337
PGSC0003DMT400000447	PGSC0003DMG400000152	PGSC0003DMP400000338
PGSC0003DMT400000448	PGSC0003DMG400000153	PGSC0003DMP400000339
PGSC0003DMT400000453	PGSC0003DMG400000155	PGSC0003DMP400000343
PGSC0003DMT400000457	PGSC0003DMG400000156	PGSC0003DMP400000347
PGSC0003DMT400000462	PGSC0003DMG400000157	PGSC0003DMP400000352
PGSC0003DMT400000464	PGSC0003DMG400000158	PGSC0003DMP400000353
PGSC0003DMT400000466	PGSC0003DMG400000159	PGSC0003DMP400000354
PGSC0003DMT400000470	PGSC0003DMG400000160	PGSC0003DMP400000357
PGSC0003DMT400000471	PGSC0003DMG400000161	PGSC0003DMP400000358
PGSC0003DMT400000473	PGSC0003DMG400000162	PGSC0003DMP400000359
PGSC0003DMT400000477	PGSC0003DMG400000164	PGSC0003DMP400000360
PGSC0003DMT400000478	PGSC0003DMG400000165	PGSC0003DMP400000361
PGSC0003DMT400000479	PGSC0003DMG400000166	PGSC0003DMP400000362
PGSC0003DMT400000482	PGSC0003DMG400000167	PGSC0003DMP400000365
PGSC0003DMT400000483	PGSC0003DMG400000168	PGSC0003DMP400000366
PGSC0003DMT400000485	PGSC0003DMG400000169	PGSC0003DMP400000367
PGSC0003DMT400000488	PGSC0003DMG400000170	PGSC0003DMP400000370
PGSC0003DMT400000489	PGSC0003DMG400000171	PGSC0003DMP400000371
PGSC0003DMT400000492	PGSC0003DMG400000172	PGSC0003DMP400000374
PGSC0003DMT400000500	PGSC0003DMG400000174	PGSC0003DMP400000377
PGSC0003DMT400000502	PGSC0003DMG400000175	PGSC0003DMP400000379
PGSC0003DMT400000503	PGSC0003DMG400000176	PGSC0003DMP400000380
PGSC0003DMT400000505	PGSC0003DMG400000177	PGSC0003DMP400000382
PGSC0003DMT400000507	PGSC0003DMG400000178	PGSC0003DMP400000384
PGSC0003DMT400000510	PGSC0003DMG400000179	PGSC0003DMP400000386
PGSC0003DMT400000512	PGSC0003DMG400000180	PGSC0003DMP400000387
PGSC0003DMT400000517	PGSC0003DMG400000181	PGSC0003DMP400000390
PGSC0003DMT400000536	PGSC0003DMG400000184	PGSC0003DMP400000404
PGSC0003DMT400000537	PGSC0003DMG400000185	PGSC0003DMP400000405
PGSC0003DMT400000538	PGSC0003DMG400000186	PGSC0003DMP400000406
PGSC0003DMT400000539	PGSC0003DMG400000187	PGSC0003DMP400000407
PGSC0003DMT400000543	PGSC0003DMG400000188	PGSC0003DMP400000410
PGSC0003DMT400000546	PGSC0003DMG400000189	PGSC0003DMP400000411
PGSC0003DMT400000547	PGSC0003DMG400000190	PGSC0003DMP400000412
PGSC0003DMT400000548	PGSC0003DMG400000191	PGSC0003DMP400000413
PGSC0003DMT400000552	PGSC0003DMG400000192	PGSC0003DMP400000416
PGSC0003DMT400000553	PGSC0003DMG400000193	PGSC0003DMP400000417
PGSC0003DMT400000557	PGSC0003DMG400000195	PGSC0003DMP400000421
PGSC0003DMT400000565	PGSC0003DMG400000197	PGSC0003DMP400000425
PGSC0003DMT400000568	PGSC0003DMG401000198	PGSC0003DMP400000428
PGSC0003DMT400000570	PGSC0003DMG402000198	PGSC0003DMP400000429
PGSC0003DMT400000574	PGSC0003DMG401000201	PGSC0003DMP400000432
PGSC0003DMT400000575	PGSC0003DMG402000201	PGSC0003DMP400000433
PGSC0003DMT400000587	PGSC0003DMG400000203	PGSC0003DMP400000443
PGSC0003DMT400000589	PGSC0003DMG400000204	PGSC0003DMP400000445
PGSC0003DMT400000591	PGSC0003DMG400000205	PGSC0003DMP400000446
PGSC0003DMT400000592	PGSC0003DMG400000206	PGSC0003DMP400000447
PGSC0003DMT400000593	PGSC0003DMG400000207	PGSC0003DMP400000448
PGSC0003DMT400000594	PGSC0003DMG400000208	PGSC0003DMP400000449
PGSC0003DMT400000595	PGSC0003DMG400000209	PGSC0003DMP400000450
PGSC0003DMT400000597	PGSC0003DMG400000210	PGSC0003DMP400000451
PGSC0003DMT400000599	PGSC0003DMG400000211	PGSC0003DMP400000453
PGSC0003DMT400000600	PGSC0003DMG400000212	PGSC0003DMP400000454
PGSC0003DMT400000601	PGSC0003DMG400000213	PGSC0003DMP400000455
PGSC0003DMT400000605	PGSC0003DMG400000214	PGSC0003DMP400000458
PGSC0003DMT400000606	PGSC0003DMG400000215	PGSC0003DMP400000459
PGSC0003DMT400000613	PGSC0003DMG402000216	PGSC0003DMP400000465
PGSC0003DMT400000619	PGSC0003DMG400000219	PGSC0003DMP400000468
PGSC0003DMT400000626	PGSC0003DMG400000221	PGSC0003DMP400000471
PGSC0003DMT400000639	PGSC0003DMG400000226	PGSC0003DMP400000479
PGSC0003DMT400000646	PGSC0003DMG400000227	PGSC0003DMP400000483
PGSC0003DMT400000647	PGSC0003DMG400000228	PGSC0003DMP400000484
PGSC0003DMT400000649	PGSC0003DMG400000229	PGSC0003DMP400000486
PGSC0003DMT400000650	PGSC0003DMG400000230	PGSC0003DMP400000487
PGSC0003DMT400000651	PGSC0003DMG400000231	PGSC0003DMP400000488
PGSC0003DMT400000652	PGSC0003DMG400000232	PGSC0003DMP400000489
PGSC0003DMT400000654	PGSC0003DMG400000233	PGSC0003DMP400000491
PGSC0003DMT400000657	PGSC0003DMG400000234	PGSC0003DMP400000494
PGSC0003DMT400000660	PGSC0003DMG400000235	PGSC0003DMP400000496
PGSC0003DMT400000662	PGSC0003DMG400000236	PGSC0003DMP400000497
PGSC0003DMT400000664	PGSC0003DMG400000237	PGSC0003DMP400000499
PGSC0003DMT400000666	PGSC0003DMG400000238	PGSC0003DMP400000501
PGSC0003DMT400000674	PGSC0003DMG400000239	PGSC0003DMP400000506
PGSC0003DMT400000676	PGSC0003DMG400000240	PGSC0003DMP400000508
PGSC0003DMT400000679	PGSC0003DMG400000241	PGSC0003DMP400000510
PGSC0003DMT400000681	PGSC0003DMG400000242	PGSC0003DMP400000512
PGSC0003DMT400000682	PGSC0003DMG400000243	PGSC0003DMP400000513
PGSC0003DMT400000685	PGSC0003DMG400000244	PGSC0003DMP400000514
PGSC0003DMT400000687	PGSC0003DMG400000245	PGSC0003DMP400000515
PGSC0003DMT400000688	PGSC0003DMG400000246	PGSC0003DMP400000516
PGSC0003DMT400000693	PGSC0003DMG400000247	PGSC0003DMP400000518
PGSC0003DMT400000694	PGSC0003DMG400000248	PGSC0003DMP400000519
PGSC0003DMT400000700	PGSC0003DMG400000251	PGSC0003DMP400000523
PGSC0003DMT400000701	PGSC0003DMG400000252	PGSC0003DMP400000524
PGSC0003DMT400000703	PGSC0003DMG400000254	PGSC0003DMP400000526
PGSC0003DMT400000704	PGSC0003DMG400000255	PGSC0003DMP400000527
PGSC0003DMT400000705	PGSC0003DMG400000256	PGSC0003DMP400000528
PGSC0003DMT400000706	PGSC0003DMG400000257	PGSC0003DMP400000529
PGSC0003DMT400000712	PGSC0003DMG400000263	PGSC0003DMP400000533
PGSC0003DMT400000713	PGSC0003DMG400000264	PGSC0003DMP400000534
PGSC0003DMT400000736	PGSC0003DMG400000270	PGSC0003DMP400000543
PGSC0003DMT400000740	PGSC0003DMG400000272	PGSC0003DMP400000545
PGSC0003DMT400000744	PGSC0003DMG400000273	PGSC0003DMP400000549
PGSC0003DMT400000747	PGSC0003DMG400000274	PGSC0003DMP400000551
PGSC0003DMT400000749	PGSC0003DMG400000275	PGSC0003DMP400000553
PGSC0003DMT400000751	PGSC0003DMG400000276	PGSC0003DMP400000555
PGSC0003DMT400000752	PGSC0003DMG400000277	PGSC0003DMP400000556
PGSC0003DMT400000757	PGSC0003DMG400000278	PGSC0003DMP400000558
PGSC0003DMT400000759	PGSC0003DMG400000279	PGSC0003DMP400000560
PGSC0003DMT400000761	PGSC0003DMG400000280	PGSC0003DMP400000562
PGSC0003DMT400000763	PGSC0003DMG400000281	PGSC0003DMP400000564
PGSC0003DMT400000764	PGSC0003DMG400000282	PGSC0003DMP400000565
PGSC0003DMT400000775	PGSC0003DMG400000285	PGSC0003DMP400000573
PGSC0003DMT400000776	PGSC0003DMG400000286	PGSC0003DMP400000574
PGSC0003DMT400000780	PGSC0003DMG401000287	PGSC0003DMP400000578
PGSC0003DMT400000783	PGSC0003DMG400000288	PGSC0003DMP400000580
PGSC0003DMT400000784	PGSC0003DMG400000289	PGSC0003DMP400000581
PGSC0003DMT400000786	PGSC0003DMG400000291	PGSC0003DMP400000583
PGSC0003DMT400000789	PGSC0003DMG400000292	PGSC0003DMP400000584
PGSC0003DMT400000791	PGSC0003DMG400000293	PGSC0003DMP400000586
PGSC0003DMT400000795	PGSC0003DMG400000295	PGSC0003DMP400000588
PGSC0003DMT400000798	PGSC0003DMG400000296	PGSC0003DMP400000590
PGSC0003DMT400000801	PGSC0003DMG400000297	PGSC0003DMP400000592
PGSC0003DMT400000803	PGSC0003DMG400000298	PGSC0003DMP400000594
PGSC0003DMT400000806	PGSC0003DMG401000299	PGSC0003DMP400000597
PGSC0003DMT400000808	PGSC0003DMG402000299	PGSC0003DMP400000599
PGSC0003DMT400000810	PGSC0003DMG400000301	PGSC0003DMP400000601
PGSC0003DMT400000811	PGSC0003DMG400000302	PGSC0003DMP400000602
PGSC0003DMT400000816	PGSC0003DMG400000304	PGSC0003DMP400000605
PGSC0003DMT400000820	PGSC0003DMG400000305	PGSC0003DMP400000609
PGSC0003DMT400000824	PGSC0003DMG401000306	PGSC0003DMP400000613
PGSC0003DMT400000825	PGSC0003DMG402000306	PGSC0003DMP400000614
PGSC0003DMT400000827	PGSC0003DMG400000307	PGSC0003DMP400000616
PGSC0003DMT400000831	PGSC0003DMG400000308	PGSC0003DMP400000617
PGSC0003DMT400000833	PGSC0003DMG400000309	PGSC0003DMP400000619
PGSC0003DMT400000835	PGSC0003DMG400000310	PGSC0003DMP400000620
PGSC0003DMT400000836	PGSC0003DMG400000311	PGSC0003DMP400000621
PGSC0003DMT400000837	PGSC0003DMG400000312	PGSC0003DMP400000622
PGSC0003DMT400000842	PGSC0003DMG400000315	PGSC0003DMP400000625
PGSC0003DMT400000846	PGSC0003DMG400000317	PGSC0003DMP400000626
PGSC0003DMT400000847	PGSC0003DMG400000318	PGSC0003DMP400000627
PGSC0003DMT400000852	PGSC0003DMG400000321	PGSC0003DMP400000631
PGSC0003DMT400000858	PGSC0003DMG400000322	PGSC0003DMP400000633
PGSC0003DMT400000859	PGSC0003DMG400000323	PGSC0003DMP400000634
PGSC0003DMT400000860	PGSC0003DMG400000324	PGSC0003DMP400000635
PGSC0003DMT400000864	PGSC0003DMG400000325	PGSC0003DMP400000637
PGSC0003DMT400000865	PGSC0003DMG400000326	PGSC0003DMP400000638
PGSC0003DMT400000866	PGSC0003DMG400000327	PGSC0003DMP400000639
PGSC0003DMT400000867	PGSC0003DMG400000328	PGSC0003DMP400000640
PGSC0003DMT400000868	PGSC0003DMG400000329	PGSC0003DMP400000641
PGSC0003DMT400000871	PGSC0003DMG400000330	PGSC0003DMP400000642
PGSC0003DMT400000873	PGSC0003DMG400000331	PGSC0003DMP400000644
PGSC0003DMT400000875	PGSC0003DMG400000332	PGSC0003DMP400000646
PGSC0003DMT400000880	PGSC0003DMG400000333	PGSC0003DMP400000649
PGSC0003DMT400000881	PGSC0003DMG400000334	PGSC0003DMP400000650
PGSC0003DMT400000888	PGSC0003DMG400000336	PGSC0003DMP400000654
PGSC0003DMT400000889	PGSC0003DMG400000337	PGSC0003DMP400000655
PGSC0003DMT400000899	PGSC0003DMG400000339	PGSC0003DMP400000661
PGSC0003DMT400000902	PGSC0003DMG400000340	PGSC0003DMP400000664
PGSC0003DMT400000908	PGSC0003DMG400000341	PGSC0003DMP400000670
PGSC0003DMT400000910	PGSC0003DMG400000342	PGSC0003DMP400000672
PGSC0003DMT400000915	PGSC0003DMG400000343	PGSC0003DMP400000675
PGSC0003DMT400000917	PGSC0003DMG400000344	PGSC0003DMP400000677
PGSC0003DMT400000921	PGSC0003DMG400000345	PGSC0003DMP400000681
PGSC0003DMT400000922	PGSC0003DMG401000346	PGSC0003DMP400000682
PGSC0003DMT400000924	PGSC0003DMG402000346	PGSC0003DMP400000684
PGSC0003DMT400000925	PGSC0003DMG400000347	PGSC0003DMP400000685
PGSC0003DMT400000930	PGSC0003DMG400000348	PGSC0003DMP400000689
PGSC0003DMT400000933	PGSC0003DMG400000350	PGSC0003DMP400000692
PGSC0003DMT400000936	PGSC0003DMG400000351	PGSC0003DMP400000695
PGSC0003DMT400000937	PGSC0003DMG400000352	PGSC0003DMP400000696
PGSC0003DMT400000942	PGSC0003DMG400000353	PGSC0003DMP400000697
PGSC0003DMT400000943	PGSC0003DMG400000354	PGSC0003DMP400000698
PGSC0003DMT400000946	PGSC0003DMG400000355	PGSC0003DMP400000699
PGSC0003DMT400000952	PGSC0003DMG400000356	PGSC0003DMP400000705
PGSC0003DMT400000953	PGSC0003DMG400000357	PGSC0003DMP400000706
PGSC0003DMT400000956	PGSC0003DMG400000358	PGSC0003DMP400000707
PGSC0003DMT400000957	PGSC0003DMG400000359	PGSC0003DMP400000708
PGSC0003DMT400000961	PGSC0003DMG400000360	PGSC0003DMP400000711
PGSC0003DMT400000975	PGSC0003DMG401000361	PGSC0003DMP400000717
PGSC0003DMT400000981	PGSC0003DMG402000361	PGSC0003DMP400000723
PGSC0003DMT400000984	PGSC0003DMG400000363	PGSC0003DMP400000726
PGSC0003DMT400000985	PGSC0003DMG400000364	PGSC0003DMP400000727
PGSC0003DMT400000986	PGSC0003DMG400000365	PGSC0003DMP400000728
PGSC0003DMT400000989	PGSC0003DMG400000366	PGSC0003DMP400000730
PGSC0003DMT400000990	PGSC0003DMG400000367	PGSC0003DMP400000731
PGSC0003DMT400000997	PGSC0003DMG400000371	PGSC0003DMP400000736
PGSC0003DMT400001003	PGSC0003DMG400000372	PGSC0003DMP400000741
PGSC0003DMT400001012	PGSC0003DMG400000374	PGSC0003DMP400000746
PGSC0003DMT400001013	PGSC0003DMG400000375	PGSC0003DMP400000747
PGSC0003DMT400001017	PGSC0003DMG400000376	PGSC0003DMP400000750
PGSC0003DMT400001020	PGSC0003DMG400000377	PGSC0003DMP400000753
PGSC0003DMT400001021	PGSC0003DMG400000378	PGSC0003DMP400000754
PGSC0003DMT400001024	PGSC0003DMG400000379	PGSC0003DMP400000755
PGSC0003DMT400001025	PGSC0003DMG400000380	PGSC0003DMP400000756
PGSC0003DMT400001026	PGSC0003DMG400000381	PGSC0003DMP400000757
PGSC0003DMT400001029	PGSC0003DMG400000383	PGSC0003DMP400000759
PGSC0003DMT400001031	PGSC0003DMG400000384	PGSC0003DMP400000760
PGSC0003DMT400001032	PGSC0003DMG400000385	PGSC0003DMP400000761
PGSC0003DMT400001033	PGSC0003DMG400000386	PGSC0003DMP400000762
PGSC0003DMT400001040	PGSC0003DMG400000392	PGSC0003DMP400000767
PGSC0003DMT400001041	PGSC0003DMG400000393	PGSC0003DMP400000768
PGSC0003DMT400001044	PGSC0003DMG400000394	PGSC0003DMP400000771
PGSC0003DMT400001047	PGSC0003DMG400000395	PGSC0003DMP400000774
PGSC0003DMT400001049	PGSC0003DMG400000396	PGSC0003DMP400000776
PGSC0003DMT400001053	PGSC0003DMG400000397	PGSC0003DMP400000779
PGSC0003DMT400001058	PGSC0003DMG400000398	PGSC0003DMP400000783
PGSC0003DMT400001059	PGSC0003DMG400000399	PGSC0003DMP400000784
PGSC0003DMT400001064	PGSC0003DMG400000401	PGSC0003DMP400000788
PGSC0003DMT400001066	PGSC0003DMG400000402	PGSC0003DMP400000789
PGSC0003DMT400001071	PGSC0003DMG400000404	PGSC0003DMP400000791
PGSC0003DMT400001072	PGSC0003DMG400000405	PGSC0003DMP400000792
PGSC0003DMT400001073	PGSC0003DMG400000406	PGSC0003DMP400000793
PGSC0003DMT400001074	PGSC0003DMG400000407	PGSC0003DMP400000794
PGSC0003DMT400001076	PGSC0003DMG400000408	PGSC0003DMP400000796
PGSC0003DMT400001077	PGSC0003DMG400000409	PGSC0003DMP400000797
PGSC0003DMT400001081	PGSC0003DMG401000410	PGSC0003DMP400000801
PGSC0003DMT400001084	PGSC0003DMG402000410	PGSC0003DMP400000804
PGSC0003DMT400001086	PGSC0003DMG400000411	PGSC0003DMP400000806
PGSC0003DMT400001087	PGSC0003DMG400000412	PGSC0003DMP400000807
PGSC0003DMT400001089	PGSC0003DMG400000413	PGSC0003DMP400000808
PGSC0003DMT400001093	PGSC0003DMG400000414	PGSC0003DMP400000811
PGSC0003DMT400001097	PGSC0003DMG400000415	PGSC0003DMP400000815
PGSC0003DMT400001101	PGSC0003DMG400000416	PGSC0003DMP400000818
PGSC0003DMT400001102	PGSC0003DMG400000417	PGSC0003DMP400000819
PGSC0003DMT400001104	PGSC0003DMG400000418	PGSC0003DMP400000821
PGSC0003DMT400001105	PGSC0003DMG400000419	PGSC0003DMP400000822
PGSC0003DMT400001108	PGSC0003DMG400000420	PGSC0003DMP400000823
PGSC0003DMT400001109	PGSC0003DMG400000421	PGSC0003DMP400000824
PGSC0003DMT400001119	PGSC0003DMG400000422	PGSC0003DMP400000831
PGSC0003DMT400001124	PGSC0003DMG400000425	PGSC0003DMP400000835
PGSC0003DMT400001133	PGSC0003DMG400000427	PGSC0003DMP400000842
PGSC0003DMT400001138	PGSC0003DMG401000428	PGSC0003DMP400000847
PGSC0003DMT400001144	PGSC0003DMG403000428	PGSC0003DMP400000851
PGSC0003DMT400001145	PGSC0003DMG400000429	PGSC0003DMP400000852
PGSC0003DMT400001149	PGSC0003DMG400000432	PGSC0003DMP400000855
PGSC0003DMT400001151	PGSC0003DMG400000433	PGSC0003DMP400000857
PGSC0003DMT400001154	PGSC0003DMG400000434	PGSC0003DMP400000859
PGSC0003DMT400001155	PGSC0003DMG400000435	PGSC0003DMP400000860
PGSC0003DMT400001167	PGSC0003DMG400000438	PGSC0003DMP400000866
PGSC0003DMT400001169	PGSC0003DMG400000439	PGSC0003DMP400000868
PGSC0003DMT400001171	PGSC0003DMG400000440	PGSC0003DMP400000870
PGSC0003DMT400001174	PGSC0003DMG400000441	PGSC0003DMP400000873
PGSC0003DMT400001178	PGSC0003DMG400000442	PGSC0003DMP400000875
PGSC0003DMT400001179	PGSC0003DMG400000443	PGSC0003DMP400000876
PGSC0003DMT400001180	PGSC0003DMG400000444	PGSC0003DMP400000877
PGSC0003DMT400001183	PGSC0003DMG400000445	PGSC0003DMP400000880
PGSC0003DMT400001192	PGSC0003DMG400000448	PGSC0003DMP400000884
PGSC0003DMT400001194	PGSC0003DMG400000449	PGSC0003DMP400000886
PGSC0003DMT400001203	PGSC0003DMG400000451	PGSC0003DMP400000894
PGSC0003DMT400001215	PGSC0003DMG400000456	PGSC0003DMP400000901
PGSC0003DMT400001216	PGSC0003DMG400000457	PGSC0003DMP400000902
PGSC0003DMT400001217	PGSC0003DMG401000458	PGSC0003DMP400000903
PGSC0003DMT400001218	PGSC0003DMG402000458	PGSC0003DMP400000904
PGSC0003DMT400001219	PGSC0003DMG400000459	PGSC0003DMP400000905
PGSC0003DMT400001221	PGSC0003DMG400000460	PGSC0003DMP400000906
PGSC0003DMT400001225	PGSC0003DMG400000462	PGSC0003DMP400000909
PGSC0003DMT400001226	PGSC0003DMG401000463	PGSC0003DMP400000910
PGSC0003DMT400001227	PGSC0003DMG402000463	PGSC0003DMP400000911
PGSC0003DMT400001232	PGSC0003DMG400000464	PGSC0003DMP400000915
PGSC0003DMT400001233	PGSC0003DMG400000465	PGSC0003DMP400000916
PGSC0003DMT400001235	PGSC0003DMG400000466	PGSC0003DMP400000918
PGSC0003DMT400001238	PGSC0003DMG400000468	PGSC0003DMP400000921
PGSC0003DMT400001242	PGSC0003DMG400000471	PGSC0003DMP400000924
PGSC0003DMT400001247	PGSC0003DMG400000476	PGSC0003DMP400000925
PGSC0003DMT400001249	PGSC0003DMG400000477	PGSC0003DMP400000927
PGSC0003DMT400001255	PGSC0003DMG402000479	PGSC0003DMP400000932
PGSC0003DMT400001259	PGSC0003DMG400000480	PGSC0003DMP400000936
PGSC0003DMT400001262	PGSC0003DMG400000481	PGSC0003DMP400000939
PGSC0003DMT400001269	PGSC0003DMG400000482	PGSC0003DMP400000942
PGSC0003DMT400001270	PGSC0003DMG400000483	PGSC0003DMP400000943
PGSC0003DMT400001273	PGSC0003DMG400000484	PGSC0003DMP400000946
PGSC0003DMT400001278	PGSC0003DMG400000485	PGSC0003DMP400000947
PGSC0003DMT400001279	PGSC0003DMG400000486	PGSC0003DMP400000948
PGSC0003DMT400001282	PGSC0003DMG400000487	PGSC0003DMP400000951
PGSC0003DMT400001283	PGSC0003DMG400000488	PGSC0003DMP400000952
PGSC0003DMT400001285	PGSC0003DMG400000489	PGSC0003DMP400000954
PGSC0003DMT400001287	PGSC0003DMG400000490	PGSC0003DMP400000956
PGSC0003DMT400001292	PGSC0003DMG400000491	PGSC0003DMP400000961
PGSC0003DMT400001296	PGSC0003DMG400000492	PGSC0003DMP400000964
PGSC0003DMT400001297	PGSC0003DMG400000493	PGSC0003DMP400000965
PGSC0003DMT400001298	PGSC0003DMG400000494	PGSC0003DMP400000966
PGSC0003DMT400001303	PGSC0003DMG400000496	PGSC0003DMP400000968
PGSC0003DMT400001305	PGSC0003DMG402000497	PGSC0003DMP400000970
PGSC0003DMT400001322	PGSC0003DMG400000498	PGSC0003DMP400000971
PGSC0003DMT400001325	PGSC0003DMG400000499	PGSC0003DMP400000974
PGSC0003DMT400001329	PGSC0003DMG400000501	PGSC0003DMP400000976
PGSC0003DMT400001332	PGSC0003DMG400000502	PGSC0003DMP400000979
PGSC0003DMT400001350	PGSC0003DMG400000505	PGSC0003DMP400000994
PGSC0003DMT400001354	PGSC0003DMG401000506	PGSC0003DMP400000996
PGSC0003DMT400001358	PGSC0003DMG402000506	PGSC0003DMP400001000
PGSC0003DMT400001367	PGSC0003DMG400000508	PGSC0003DMP400001009
PGSC0003DMT400001369	PGSC0003DMG400000509	PGSC0003DMP400001011
PGSC0003DMT400001373	PGSC0003DMG400000510	PGSC0003DMP400001013
PGSC0003DMT400001375	PGSC0003DMG400000511	PGSC0003DMP400001015
PGSC0003DMT400001376	PGSC0003DMG400000512	PGSC0003DMP400001016
PGSC0003DMT400001378	PGSC0003DMG400000513	PGSC0003DMP400001018
PGSC0003DMT400001379	PGSC0003DMG400000514	PGSC0003DMP400001019
PGSC0003DMT400001382	PGSC0003DMG401000515	PGSC0003DMP400001022
PGSC0003DMT400001383	PGSC0003DMG402000515	PGSC0003DMP400001023
PGSC0003DMT400001389	PGSC0003DMG400000516	PGSC0003DMP400001026
PGSC0003DMT400001392	PGSC0003DMG402000517	PGSC0003DMP400001029
PGSC0003DMT400001396	PGSC0003DMG400000518	PGSC0003DMP400001030
PGSC0003DMT400001398	PGSC0003DMG400000519	PGSC0003DMP400001032
PGSC0003DMT400001401	PGSC0003DMG400000521	PGSC0003DMP400001035
PGSC0003DMT400001405	PGSC0003DMG400000523	PGSC0003DMP400001039
PGSC0003DMT400001409	PGSC0003DMG402000524	PGSC0003DMP400001041
PGSC0003DMT400001410	PGSC0003DMG403000524	PGSC0003DMP400001042
PGSC0003DMT400001412	PGSC0003DMG400000525	PGSC0003DMP400001044
PGSC0003DMT400001417	PGSC0003DMG402000526	PGSC0003DMP400001049
PGSC0003DMT400001418	PGSC0003DMG401000526	PGSC0003DMP400001050
PGSC0003DMT400001421	PGSC0003DMG401000527	PGSC0003DMP400001053
PGSC0003DMT400001425	PGSC0003DMG402000527	PGSC0003DMP400001057
PGSC0003DMT400001426	PGSC0003DMG401000528	PGSC0003DMP400001058
PGSC0003DMT400001429	PGSC0003DMG402000528	PGSC0003DMP400001061
PGSC0003DMT400001435	PGSC0003DMG400000529	PGSC0003DMP400001066
PGSC0003DMT400001436	PGSC0003DMG400000530	PGSC0003DMP400001067
PGSC0003DMT400001437	PGSC0003DMG400000531	PGSC0003DMP400001068
PGSC0003DMT400001454	PGSC0003DMG400000536	PGSC0003DMP400001078
PGSC0003DMT400001460	PGSC0003DMG400000537	PGSC0003DMP400001084
PGSC0003DMT400001464	PGSC0003DMG400000538	PGSC0003DMP400001088
PGSC0003DMT400001465	PGSC0003DMG400000539	PGSC0003DMP400001089
PGSC0003DMT400001467	PGSC0003DMG400000540	PGSC0003DMP400001091
PGSC0003DMT400001468	PGSC0003DMG400000541	PGSC0003DMP400001092
PGSC0003DMT400001470	PGSC0003DMG400000542	PGSC0003DMP400001094
PGSC0003DMT400001472	PGSC0003DMG400000543	PGSC0003DMP400001095
PGSC0003DMT400001473	PGSC0003DMG400000544	PGSC0003DMP400001096
PGSC0003DMT400001474	PGSC0003DMG400000545	PGSC0003DMP400001097
PGSC0003DMT400001475	PGSC0003DMG400000546	PGSC0003DMP400001098
PGSC0003DMT400001476	PGSC0003DMG400000547	PGSC0003DMP400001099
PGSC0003DMT400001478	PGSC0003DMG400000548	PGSC0003DMP400001101
PGSC0003DMT400001484	PGSC0003DMG400000549	PGSC0003DMP400001103
PGSC0003DMT400001488	PGSC0003DMG400000551	PGSC0003DMP400001105
PGSC0003DMT400001489	PGSC0003DMG400000552	PGSC0003DMP400001106
PGSC0003DMT400001491	PGSC0003DMG400000553	PGSC0003DMP400001107
PGSC0003DMT400001492	PGSC0003DMG401000554	PGSC0003DMP400001108
PGSC0003DMT400001495	PGSC0003DMG402000554	PGSC0003DMP400001111
PGSC0003DMT400001498	PGSC0003DMG400000555	PGSC0003DMP400001114
PGSC0003DMT400001502	PGSC0003DMG400000556	PGSC0003DMP400001116
PGSC0003DMT400001508	PGSC0003DMG400000558	PGSC0003DMP400001121
PGSC0003DMT400001510	PGSC0003DMG400000559	PGSC0003DMP400001122
PGSC0003DMT400001512	PGSC0003DMG400000560	PGSC0003DMP400001124
PGSC0003DMT400001513	PGSC0003DMG400000561	PGSC0003DMP400001125
PGSC0003DMT400001515	PGSC0003DMG400000562	PGSC0003DMP400001127
PGSC0003DMT400001522	PGSC0003DMG400000565	PGSC0003DMP400001130
PGSC0003DMT400001524	PGSC0003DMG400000566	PGSC0003DMP400001132
PGSC0003DMT400001526	PGSC0003DMG401000567	PGSC0003DMP400001134
PGSC0003DMT400001528	PGSC0003DMG402000567	PGSC0003DMP400001136
PGSC0003DMT400001530	PGSC0003DMG400000568	PGSC0003DMP400001138
PGSC0003DMT400001532	PGSC0003DMG400000569	PGSC0003DMP400001140
PGSC0003DMT400001535	PGSC0003DMG400000570	PGSC0003DMP400001143
PGSC0003DMT400001540	PGSC0003DMG400000571	PGSC0003DMP400001147
PGSC0003DMT400001542	PGSC0003DMG400000572	PGSC0003DMP400001149
PGSC0003DMT400001548	PGSC0003DMG400000574	PGSC0003DMP400001152
PGSC0003DMT400001555	PGSC0003DMG400000575	PGSC0003DMP400001157
PGSC0003DMT400001563	PGSC0003DMG400000576	PGSC0003DMP400001165
PGSC0003DMT400001564	PGSC0003DMG400000577	PGSC0003DMP400001166
PGSC0003DMT400001565	PGSC0003DMG400000578	PGSC0003DMP400001167
PGSC0003DMT400001566	PGSC0003DMG400000579	PGSC0003DMP400001168
PGSC0003DMT400001568	PGSC0003DMG400000580	PGSC0003DMP400001170
PGSC0003DMT400001569	PGSC0003DMG400000581	PGSC0003DMP400001171
PGSC0003DMT400001570	PGSC0003DMG400000582	PGSC0003DMP400001172
PGSC0003DMT400001571	PGSC0003DMG400000583	PGSC0003DMP400001173
PGSC0003DMT400001574	PGSC0003DMG400000584	PGSC0003DMP400001176
PGSC0003DMT400001576	PGSC0003DMG402000585	PGSC0003DMP400001178
PGSC0003DMT400001582	PGSC0003DMG403000585	PGSC0003DMP400001180
PGSC0003DMT400001588	PGSC0003DMG400000587	PGSC0003DMP400001184
PGSC0003DMT400001589	PGSC0003DMG400000588	PGSC0003DMP400001185
PGSC0003DMT400001592	PGSC0003DMG400000591	PGSC0003DMP400001187
PGSC0003DMT400001593	PGSC0003DMG400000592	PGSC0003DMP400001188
PGSC0003DMT400001594	PGSC0003DMG400000593	PGSC0003DMP400001189
PGSC0003DMT400001596	PGSC0003DMG401000594	PGSC0003DMP400001190
PGSC0003DMT400001600	PGSC0003DMG402000594	PGSC0003DMP400001193
PGSC0003DMT400001601	PGSC0003DMG403000594	PGSC0003DMP400001194
PGSC0003DMT400001604	PGSC0003DMG404000594	PGSC0003DMP400001196
PGSC0003DMT400001611	PGSC0003DMG400000595	PGSC0003DMP400001200
PGSC0003DMT400001612	PGSC0003DMG400000596	PGSC0003DMP400001201
PGSC0003DMT400001613	PGSC0003DMG400000597	PGSC0003DMP400001202
PGSC0003DMT400001615	PGSC0003DMG400000598	PGSC0003DMP400001204
PGSC0003DMT400001617	PGSC0003DMG400000599	PGSC0003DMP400001206
PGSC0003DMT400001618	PGSC0003DMG400000600	PGSC0003DMP400001207
PGSC0003DMT400001620	PGSC0003DMG400000601	PGSC0003DMP400001208
PGSC0003DMT400001624	PGSC0003DMG400000602	PGSC0003DMP400001211
PGSC0003DMT400001627	PGSC0003DMG400000603	PGSC0003DMP400001213
PGSC0003DMT400001635	PGSC0003DMG400000606	PGSC0003DMP400001216
PGSC0003DMT400001636	PGSC0003DMG400000607	PGSC0003DMP400001217
PGSC0003DMT400001638	PGSC0003DMG400000608	PGSC0003DMP400001219
PGSC0003DMT400001642	PGSC0003DMG400000611	PGSC0003DMP400001222
PGSC0003DMT400001643	PGSC0003DMG400000612	PGSC0003DMP400001223
PGSC0003DMT400001646	PGSC0003DMG400000613	PGSC0003DMP400001226
PGSC0003DMT400001650	PGSC0003DMG400000614	PGSC0003DMP400001227
PGSC0003DMT400001652	PGSC0003DMG400000615	PGSC0003DMP400001229
PGSC0003DMT400001656	PGSC0003DMG400000616	PGSC0003DMP400001230
PGSC0003DMT400001658	PGSC0003DMG401000617	PGSC0003DMP400001232
PGSC0003DMT400001659	PGSC0003DMG402000617	PGSC0003DMP400001233
PGSC0003DMT400001660	PGSC0003DMG400000618	PGSC0003DMP400001234
PGSC0003DMT400001661	PGSC0003DMG400000619	PGSC0003DMP400001235
PGSC0003DMT400001663	PGSC0003DMG400000620	PGSC0003DMP400001237
PGSC0003DMT400001664	PGSC0003DMG400000621	PGSC0003DMP400001238
PGSC0003DMT400001668	PGSC0003DMG400000623	PGSC0003DMP400001240
PGSC0003DMT400001674	PGSC0003DMG400000625	PGSC0003DMP400001242
PGSC0003DMT400001679	PGSC0003DMG400000627	PGSC0003DMP400001247
PGSC0003DMT400001680	PGSC0003DMG400000628	PGSC0003DMP400001248
PGSC0003DMT400001681	PGSC0003DMG401000629	PGSC0003DMP400001249
PGSC0003DMT400001682	PGSC0003DMG402000629	PGSC0003DMP400001250
PGSC0003DMT400001683	PGSC0003DMG401000630	PGSC0003DMP400001251
PGSC0003DMT400001685	PGSC0003DMG402000630	PGSC0003DMP400001253
PGSC0003DMT400001688	PGSC0003DMG400000631	PGSC0003DMP400001256
PGSC0003DMT400001691	PGSC0003DMG400000632	PGSC0003DMP400001259
PGSC0003DMT400001692	PGSC0003DMG400000633	PGSC0003DMP400001260
PGSC0003DMT400001701	PGSC0003DMG400000634	PGSC0003DMP400001261
PGSC0003DMT400001702	PGSC0003DMG400000635	PGSC0003DMP400001262
PGSC0003DMT400001703	PGSC0003DMG400000636	PGSC0003DMP400001263
PGSC0003DMT400001705	PGSC0003DMG400000637	PGSC0003DMP400001264
PGSC0003DMT400001709	PGSC0003DMG400000639	PGSC0003DMP400001266
PGSC0003DMT400001712	PGSC0003DMG400000640	PGSC0003DMP400001268
PGSC0003DMT400001716	PGSC0003DMG400000642	PGSC0003DMP400001272
PGSC0003DMT400001718	PGSC0003DMG400000643	PGSC0003DMP400001274
PGSC0003DMT400001722	PGSC0003DMG400000644	PGSC0003DMP400001277
PGSC0003DMT400001726	PGSC0003DMG400000645	PGSC0003DMP400001281
PGSC0003DMT400001736	PGSC0003DMG400000650	PGSC0003DMP400001286
PGSC0003DMT400001743	PGSC0003DMG400000652	PGSC0003DMP400001288
PGSC0003DMT400001745	PGSC0003DMG400000653	PGSC0003DMP400001290
PGSC0003DMT400001746	PGSC0003DMG400000654	PGSC0003DMP400001291
PGSC0003DMT400001750	PGSC0003DMG400000655	PGSC0003DMP400001295
PGSC0003DMT400001759	PGSC0003DMG400000657	PGSC0003DMP400001297
PGSC0003DMT400001768	PGSC0003DMG400000660	PGSC0003DMP400001304
PGSC0003DMT400001769	PGSC0003DMG400000661	PGSC0003DMP400001305
PGSC0003DMT400001770	PGSC0003DMG400000662	PGSC0003DMP400001306
PGSC0003DMT400001772	PGSC0003DMG400000663	PGSC0003DMP400001308
PGSC0003DMT400001773	PGSC0003DMG400000664	PGSC0003DMP400001309
PGSC0003DMT400001775	PGSC0003DMG400000665	PGSC0003DMP400001311
PGSC0003DMT400001776	PGSC0003DMG400000666	PGSC0003DMP400001312
PGSC0003DMT400001779	PGSC0003DMG400000667	PGSC0003DMP400001313
PGSC0003DMT400001781	PGSC0003DMG401000668	PGSC0003DMP400001315
PGSC0003DMT400001784	PGSC0003DMG402000668	PGSC0003DMP400001318
PGSC0003DMT400001787	PGSC0003DMG400000670	PGSC0003DMP400001321
PGSC0003DMT400001793	PGSC0003DMG400000672	PGSC0003DMP400001324
PGSC0003DMT400001796	PGSC0003DMG400000673	PGSC0003DMP400001327
PGSC0003DMT400001799	PGSC0003DMG401000674	PGSC0003DMP400001328
PGSC0003DMT400001803	PGSC0003DMG402000674	PGSC0003DMP400001331
PGSC0003DMT400001805	PGSC0003DMG400000675	PGSC0003DMP400001333
PGSC0003DMT400001808	PGSC0003DMG400000676	PGSC0003DMP400001335
PGSC0003DMT400001813	PGSC0003DMG400000678	PGSC0003DMP400001339
PGSC0003DMT400001820	PGSC0003DMG400000681	PGSC0003DMP400001342
PGSC0003DMT400001821	PGSC0003DMG400000682	PGSC0003DMP400001343
PGSC0003DMT400001824	PGSC0003DMG400000684	PGSC0003DMP400001345
PGSC0003DMT400001826	PGSC0003DMG400000685	PGSC0003DMP400001347
PGSC0003DMT400001832	PGSC0003DMG400000688	PGSC0003DMP400001351
PGSC0003DMT400001833	PGSC0003DMG400000689	PGSC0003DMP400001352
PGSC0003DMT400001836	PGSC0003DMG400000690	PGSC0003DMP400001355
PGSC0003DMT400001839	PGSC0003DMG400000691	PGSC0003DMP400001358
PGSC0003DMT400001856	PGSC0003DMG400000695	PGSC0003DMP400001369
PGSC0003DMT400001858	PGSC0003DMG400000696	PGSC0003DMP400001370
PGSC0003DMT400001860	PGSC0003DMG400000697	PGSC0003DMP400001371
PGSC0003DMT400001865	PGSC0003DMG400000702	PGSC0003DMP400001374
PGSC0003DMT400001868	PGSC0003DMG400000703	PGSC0003DMP400001376
PGSC0003DMT400001869	PGSC0003DMG400000704	PGSC0003DMP400001377
PGSC0003DMT400001872	PGSC0003DMG400000706	PGSC0003DMP400001378
PGSC0003DMT400001875	PGSC0003DMG400000707	PGSC0003DMP400001381
PGSC0003DMT400001879	PGSC0003DMG400000708	PGSC0003DMP400001384
PGSC0003DMT400001883	PGSC0003DMG400000709	PGSC0003DMP400001385
PGSC0003DMT400001885	PGSC0003DMG400000710	PGSC0003DMP400001387
PGSC0003DMT400001888	PGSC0003DMG400000711	PGSC0003DMP400001390
PGSC0003DMT400001894	PGSC0003DMG400000713	PGSC0003DMP400001393
PGSC0003DMT400001896	PGSC0003DMG400000714	PGSC0003DMP400001395
PGSC0003DMT400001898	PGSC0003DMG400000715	PGSC0003DMP400001397
PGSC0003DMT400001900	PGSC0003DMG400000717	PGSC0003DMP400001399
PGSC0003DMT400001901	PGSC0003DMG400000718	PGSC0003DMP400001400
PGSC0003DMT400001903	PGSC0003DMG400000719	PGSC0003DMP400001402
PGSC0003DMT400001904	PGSC0003DMG400000720	PGSC0003DMP400001403
PGSC0003DMT400001905	PGSC0003DMG400000721	PGSC0003DMP400001404
PGSC0003DMT400001906	PGSC0003DMG401000722	PGSC0003DMP400001405
PGSC0003DMT400001908	PGSC0003DMG402000722	PGSC0003DMP400001406
PGSC0003DMT400001911	PGSC0003DMG400000723	PGSC0003DMP400001409
PGSC0003DMT400001912	PGSC0003DMG400000724	PGSC0003DMP400001410
PGSC0003DMT400001913	PGSC0003DMG400000725	PGSC0003DMP400001411
PGSC0003DMT400001914	PGSC0003DMG400000726	PGSC0003DMP400001412
PGSC0003DMT400001916	PGSC0003DMG400000727	PGSC0003DMP400001414
PGSC0003DMT400001921	PGSC0003DMG400000728	PGSC0003DMP400001419
PGSC0003DMT400001923	PGSC0003DMG400000729	PGSC0003DMP400001421
PGSC0003DMT400001924	PGSC0003DMG400000730	PGSC0003DMP400001422
PGSC0003DMT400001925	PGSC0003DMG400000731	PGSC0003DMP400001423
PGSC0003DMT400001933	PGSC0003DMG400000733	PGSC0003DMP400001427
PGSC0003DMT400001934	PGSC0003DMG400000734	PGSC0003DMP400001428
PGSC0003DMT400001935	PGSC0003DMG400000735	PGSC0003DMP400001429
PGSC0003DMT400001937	PGSC0003DMG400000736	PGSC0003DMP400001431
PGSC0003DMT400001939	PGSC0003DMG400000737	PGSC0003DMP400001433
PGSC0003DMT400001942	PGSC0003DMG400000738	PGSC0003DMP400001436
PGSC0003DMT400001948	PGSC0003DMG400000740	PGSC0003DMP400001439
PGSC0003DMT400001949	PGSC0003DMG400000741	PGSC0003DMP400001440
PGSC0003DMT400001954	PGSC0003DMG400000742	PGSC0003DMP400001441
PGSC0003DMT400001958	PGSC0003DMG400000744	PGSC0003DMP400001443
PGSC0003DMT400001960	PGSC0003DMG400000745	PGSC0003DMP400001445
PGSC0003DMT400001965	PGSC0003DMG400000746	PGSC0003DMP400001446
PGSC0003DMT400001966	PGSC0003DMG400000747	PGSC0003DMP400001447
PGSC0003DMT400001975	PGSC0003DMG400000750	PGSC0003DMP400001450
PGSC0003DMT400001980	PGSC0003DMG400000752	PGSC0003DMP400001453
PGSC0003DMT400001985	PGSC0003DMG400000753	PGSC0003DMP400001457
PGSC0003DMT400001990	PGSC0003DMG400000754	PGSC0003DMP400001461
PGSC0003DMT400001992	PGSC0003DMG400000755	PGSC0003DMP400001462
PGSC0003DMT400001994	PGSC0003DMG400000756	PGSC0003DMP400001463
PGSC0003DMT400001995	PGSC0003DMG400000757	PGSC0003DMP400001464
PGSC0003DMT400001997	PGSC0003DMG400000758	PGSC0003DMP400001466
PGSC0003DMT400001999	PGSC0003DMG400000759	PGSC0003DMP400001468
PGSC0003DMT400002003	PGSC0003DMG400000761	PGSC0003DMP400001472
PGSC0003DMT400002013	PGSC0003DMG402000764	PGSC0003DMP400001477
PGSC0003DMT400002016	PGSC0003DMG400000765	PGSC0003DMP400001478
PGSC0003DMT400002019	PGSC0003DMG400000766	PGSC0003DMP400001479
PGSC0003DMT400002020	PGSC0003DMG400000767	PGSC0003DMP400001480
PGSC0003DMT400002024	PGSC0003DMG400000771	PGSC0003DMP400001483
PGSC0003DMT400002032	PGSC0003DMG400000774	PGSC0003DMP400001487
PGSC0003DMT400002033	PGSC0003DMG400000775	PGSC0003DMP400001488
PGSC0003DMT400002035	PGSC0003DMG400000776	PGSC0003DMP400001489
PGSC0003DMT400002036	PGSC0003DMG400000777	PGSC0003DMP400001490
PGSC0003DMT400002037	PGSC0003DMG400000778	PGSC0003DMP400001491
PGSC0003DMT400002040	PGSC0003DMG400000779	PGSC0003DMP400001492
PGSC0003DMT400002042	PGSC0003DMG400000780	PGSC0003DMP400001493
PGSC0003DMT400002047	PGSC0003DMG400000781	PGSC0003DMP400001494
PGSC0003DMT400002049	PGSC0003DMG400000782	PGSC0003DMP400001495
PGSC0003DMT400002054	PGSC0003DMG400000783	PGSC0003DMP400001497
PGSC0003DMT400002057	PGSC0003DMG400000785	PGSC0003DMP400001500
PGSC0003DMT400002062	PGSC0003DMG400000787	PGSC0003DMP400001505
PGSC0003DMT400002065	PGSC0003DMG401000788	PGSC0003DMP400001507
PGSC0003DMT400002066	PGSC0003DMG402000788	PGSC0003DMP400001508
PGSC0003DMT400002076	PGSC0003DMG401000790	PGSC0003DMP400001510
PGSC0003DMT400002078	PGSC0003DMG402000790	PGSC0003DMP400001512
PGSC0003DMT400002079	PGSC0003DMG400000791	PGSC0003DMP400001513
PGSC0003DMT400002081	PGSC0003DMG400000792	PGSC0003DMP400001515
PGSC0003DMT400002085	PGSC0003DMG400000794	PGSC0003DMP400001516
PGSC0003DMT400002087	PGSC0003DMG401000796	PGSC0003DMP400001517
PGSC0003DMT400002093	PGSC0003DMG402000796	PGSC0003DMP400001523
PGSC0003DMT400002094	PGSC0003DMG400000797	PGSC0003DMP400001524
PGSC0003DMT400002095	PGSC0003DMG400000798	PGSC0003DMP400001525
PGSC0003DMT400002100	PGSC0003DMG400000799	PGSC0003DMP400001527
PGSC0003DMT400002103	PGSC0003DMG400000802	PGSC0003DMP400001529
PGSC0003DMT400002104	PGSC0003DMG400000803	PGSC0003DMP400001530
PGSC0003DMT400002108	PGSC0003DMG400000804	PGSC0003DMP400001534
PGSC0003DMT400002112	PGSC0003DMG400000805	PGSC0003DMP400001536
PGSC0003DMT400002115	PGSC0003DMG400000806	PGSC0003DMP400001538
PGSC0003DMT400002116	PGSC0003DMG400000807	PGSC0003DMP400001539
PGSC0003DMT400002119	PGSC0003DMG400000808	PGSC0003DMP400001542
PGSC0003DMT400002122	PGSC0003DMG400000809	PGSC0003DMP400001544
PGSC0003DMT400002124	PGSC0003DMG400000810	PGSC0003DMP400001546
PGSC0003DMT400002125	PGSC0003DMG400000811	PGSC0003DMP400001547
PGSC0003DMT400002126	PGSC0003DMG400000812	PGSC0003DMP400001548
PGSC0003DMT400002128	PGSC0003DMG400000813	PGSC0003DMP400001550
PGSC0003DMT400002131	PGSC0003DMG400000815	PGSC0003DMP400001553
PGSC0003DMT400002134	PGSC0003DMG400000816	PGSC0003DMP400001556
PGSC0003DMT400002139	PGSC0003DMG401000817	PGSC0003DMP400001559
PGSC0003DMT400002142	PGSC0003DMG402000817	PGSC0003DMP400001561
PGSC0003DMT400002144	PGSC0003DMG400000818	PGSC0003DMP400001563
PGSC0003DMT400002145	PGSC0003DMG400000819	PGSC0003DMP400001564
PGSC0003DMT400002150	PGSC0003DMG400000822	PGSC0003DMP400001567
PGSC0003DMT400002155	PGSC0003DMG400000824	PGSC0003DMP400001571
PGSC0003DMT400002156	PGSC0003DMG400000825	PGSC0003DMP400001572
PGSC0003DMT400002160	PGSC0003DMG400000826	PGSC0003DMP400001573
PGSC0003DMT400002161	PGSC0003DMG400000827	PGSC0003DMP400001574
PGSC0003DMT400002162	PGSC0003DMG400000828	PGSC0003DMP400001575
PGSC0003DMT400002167	PGSC0003DMG400000829	PGSC0003DMP400001577
PGSC0003DMT400002168	PGSC0003DMG400000830	PGSC0003DMP400001578
PGSC0003DMT400002180	PGSC0003DMG400000834	PGSC0003DMP400001586
PGSC0003DMT400002184	PGSC0003DMG400000836	PGSC0003DMP400001590
PGSC0003DMT400002192	PGSC0003DMG400000840	PGSC0003DMP400001596
PGSC0003DMT400002199	PGSC0003DMG400000842	PGSC0003DMP400001603
PGSC0003DMT400002201	PGSC0003DMG400000843	PGSC0003DMP400001605
PGSC0003DMT400002209	PGSC0003DMG400000846	PGSC0003DMP400001612
PGSC0003DMT400002214	PGSC0003DMG400000847	PGSC0003DMP400001615
PGSC0003DMT400002219	PGSC0003DMG400000849	PGSC0003DMP400001617
PGSC0003DMT400002220	PGSC0003DMG400000850	PGSC0003DMP400001618
PGSC0003DMT400002222	PGSC0003DMG400000851	PGSC0003DMP400001619
PGSC0003DMT400002227	PGSC0003DMG400000854	PGSC0003DMP400001622
PGSC0003DMT400002229	PGSC0003DMG400000856	PGSC0003DMP400001623
PGSC0003DMT400002232	PGSC0003DMG400000857	PGSC0003DMP400001626
PGSC0003DMT400002240	PGSC0003DMG401000859	PGSC0003DMP400001632
PGSC0003DMT400002241	PGSC0003DMG402000859	PGSC0003DMP400001633
PGSC0003DMT400002245	PGSC0003DMG402000860	PGSC0003DMP400001637
PGSC0003DMT400002249	PGSC0003DMG401000860	PGSC0003DMP400001641
PGSC0003DMT400002254	PGSC0003DMG400000861	PGSC0003DMP400001644
PGSC0003DMT400002256	PGSC0003DMG400000862	PGSC0003DMP400001646
PGSC0003DMT400002259	PGSC0003DMG400000863	PGSC0003DMP400001648
PGSC0003DMT400002261	PGSC0003DMG400000864	PGSC0003DMP400001650
PGSC0003DMT400002273	PGSC0003DMG400000869	PGSC0003DMP400001655
PGSC0003DMT400002277	PGSC0003DMG400000871	PGSC0003DMP400001656
PGSC0003DMT400002280	PGSC0003DMG400000872	PGSC0003DMP400001657
PGSC0003DMT400002284	PGSC0003DMG400000874	PGSC0003DMP400001660
PGSC0003DMT400002287	PGSC0003DMG400000875	PGSC0003DMP400001662
PGSC0003DMT400002293	PGSC0003DMG400000879	PGSC0003DMP400001665
PGSC0003DMT400002299	PGSC0003DMG400000881	PGSC0003DMP400001671
PGSC0003DMT400002305	PGSC0003DMG400000883	PGSC0003DMP400001674
PGSC0003DMT400002306	PGSC0003DMG400000884	PGSC0003DMP400001675
PGSC0003DMT400002312	PGSC0003DMG400000885	PGSC0003DMP400001678
PGSC0003DMT400002316	PGSC0003DMG400000886	PGSC0003DMP400001682
PGSC0003DMT400002331	PGSC0003DMG400000890	PGSC0003DMP400001687
PGSC0003DMT400002334	PGSC0003DMG400000891	PGSC0003DMP400001690
PGSC0003DMT400002337	PGSC0003DMG400000892	PGSC0003DMP400001692
PGSC0003DMT400002340	PGSC0003DMG400000893	PGSC0003DMP400001693
PGSC0003DMT400002341	PGSC0003DMG400000894	PGSC0003DMP400001694
PGSC0003DMT400002342	PGSC0003DMG401000895	PGSC0003DMP400001695
PGSC0003DMT400002345	PGSC0003DMG402000895	PGSC0003DMP400001698
PGSC0003DMT400002347	PGSC0003DMG400000896	PGSC0003DMP400001700
PGSC0003DMT400002350	PGSC0003DMG400000897	PGSC0003DMP400001703
PGSC0003DMT400002352	PGSC0003DMG400000898	PGSC0003DMP400001705
PGSC0003DMT400002358	PGSC0003DMG400000901	PGSC0003DMP400001711
PGSC0003DMT400002361	PGSC0003DMG400000903	PGSC0003DMP400001713
PGSC0003DMT400002367	PGSC0003DMG400000905	PGSC0003DMP400001717
PGSC0003DMT400002368	PGSC0003DMG400000906	PGSC0003DMP400001718
PGSC0003DMT400002373	PGSC0003DMG400000909	PGSC0003DMP400001722
PGSC0003DMT400002375	PGSC0003DMG400000910	PGSC0003DMP400001723
PGSC0003DMT400002378	PGSC0003DMG400000912	PGSC0003DMP400001726
PGSC0003DMT400002381	PGSC0003DMG401000914	PGSC0003DMP400001728
PGSC0003DMT400002386	PGSC0003DMG400000915	PGSC0003DMP400001732
PGSC0003DMT400002388	PGSC0003DMG401000916	PGSC0003DMP400001733
PGSC0003DMT400002390	PGSC0003DMG402000916	PGSC0003DMP400001735
PGSC0003DMT400002402	PGSC0003DMG400000917	PGSC0003DMP400001745
PGSC0003DMT400002403	PGSC0003DMG400000918	PGSC0003DMP400001746
PGSC0003DMT400002407	PGSC0003DMG400000919	PGSC0003DMP400001750
PGSC0003DMT400002410	PGSC0003DMG400000922	PGSC0003DMP400001751
PGSC0003DMT400002412	PGSC0003DMG401000923	PGSC0003DMP400001753
PGSC0003DMT400002414	PGSC0003DMG402000923	PGSC0003DMP400001754
PGSC0003DMT400002421	PGSC0003DMG400000926	PGSC0003DMP400001760
PGSC0003DMT400002424	PGSC0003DMG401000927	PGSC0003DMP400001763
PGSC0003DMT400002438	PGSC0003DMG400000928	PGSC0003DMP400001769
PGSC0003DMT400002445	PGSC0003DMG400000930	PGSC0003DMP400001771
PGSC0003DMT400002448	PGSC0003DMG400000931	PGSC0003DMP400001774
PGSC0003DMT400002449	PGSC0003DMG400000932	PGSC0003DMP400001775
PGSC0003DMT400002451	PGSC0003DMG400000933	PGSC0003DMP400001777
PGSC0003DMT400002454	PGSC0003DMG400000935	PGSC0003DMP400001780
PGSC0003DMT400002456	PGSC0003DMG400000936	PGSC0003DMP400001782
PGSC0003DMT400002457	PGSC0003DMG400000937	PGSC0003DMP400001783
PGSC0003DMT400002459	PGSC0003DMG401000938	PGSC0003DMP400001784
PGSC0003DMT400002463	PGSC0003DMG402000938	PGSC0003DMP400001787
PGSC0003DMT400002468	PGSC0003DMG400000941	PGSC0003DMP400001789
PGSC0003DMT400002471	PGSC0003DMG400000942	PGSC0003DMP400001792
PGSC0003DMT400002472	PGSC0003DMG401000943	PGSC0003DMP400001793
PGSC0003DMT400002474	PGSC0003DMG402000943	PGSC0003DMP400001795
PGSC0003DMT400002479	PGSC0003DMG400000944	PGSC0003DMP400001800
PGSC0003DMT400002491	PGSC0003DMG400000949	PGSC0003DMP400001809
PGSC0003DMT400002497	PGSC0003DMG400000951	PGSC0003DMP400001815
PGSC0003DMT400002498	PGSC0003DMG400000952	PGSC0003DMP400001816
PGSC0003DMT400002502	PGSC0003DMG400000954	PGSC0003DMP400001818
PGSC0003DMT400002504	PGSC0003DMG400000955	PGSC0003DMP400001820
PGSC0003DMT400002509	PGSC0003DMG400000957	PGSC0003DMP400001825
PGSC0003DMT400002512	PGSC0003DMG400000958	PGSC0003DMP400001828
PGSC0003DMT400002520	PGSC0003DMG400000962	PGSC0003DMP400001833
PGSC0003DMT400002527	PGSC0003DMG400000963	PGSC0003DMP400001840
PGSC0003DMT400002536	PGSC0003DMG400000965	PGSC0003DMP400001846
PGSC0003DMT400002541	PGSC0003DMG400000968	PGSC0003DMP400001851
PGSC0003DMT400002552	PGSC0003DMG400000976	PGSC0003DMP400001858
PGSC0003DMT400002554	PGSC0003DMG400000977	PGSC0003DMP400001860
PGSC0003DMT400002555	PGSC0003DMG400000978	PGSC0003DMP400001861
PGSC0003DMT400002556	PGSC0003DMG400000979	PGSC0003DMP400001862
PGSC0003DMT400002558	PGSC0003DMG400000980	PGSC0003DMP400001864
PGSC0003DMT400002559	PGSC0003DMG400000981	PGSC0003DMP400001865
PGSC0003DMT400002565	PGSC0003DMG400000983	PGSC0003DMP400001870
PGSC0003DMT400002567	PGSC0003DMG400000984	PGSC0003DMP400001871
PGSC0003DMT400002569	PGSC0003DMG400000985	PGSC0003DMP400001873
PGSC0003DMT400002573	PGSC0003DMG400000988	PGSC0003DMP400001876
PGSC0003DMT400002583	PGSC0003DMG400000991	PGSC0003DMP400001879
PGSC0003DMT400002590	PGSC0003DMG400000993	PGSC0003DMP400001883
PGSC0003DMT400002592	PGSC0003DMG400000994	PGSC0003DMP400001885
PGSC0003DMT400002595	PGSC0003DMG400000995	PGSC0003DMP400001887
PGSC0003DMT400002598	PGSC0003DMG400000996	PGSC0003DMP400001890
PGSC0003DMT400002599	PGSC0003DMG400000997	PGSC0003DMP400001891
PGSC0003DMT400002602	PGSC0003DMG400000998	PGSC0003DMP400001893
PGSC0003DMT400002603	PGSC0003DMG400000999	PGSC0003DMP400001894
PGSC0003DMT400002606	PGSC0003DMG400001001	PGSC0003DMP400001896
PGSC0003DMT400002609	PGSC0003DMG400001003	PGSC0003DMP400001898
PGSC0003DMT400002617	PGSC0003DMG400001006	PGSC0003DMP400001904
PGSC0003DMT400002635	PGSC0003DMG401001013	PGSC0003DMP400001915
PGSC0003DMT400002636	PGSC0003DMG402001013	PGSC0003DMP400001916
PGSC0003DMT400002642	PGSC0003DMG400001014	PGSC0003DMP400001921
PGSC0003DMT400002661	PGSC0003DMG400001024	PGSC0003DMP400001930
PGSC0003DMT400002668	PGSC0003DMG400001028	PGSC0003DMP400001935
PGSC0003DMT400002671	PGSC0003DMG400001030	PGSC0003DMP400001938
PGSC0003DMT400002674	PGSC0003DMG400001031	PGSC0003DMP400001940
PGSC0003DMT400002678	PGSC0003DMG400001032	PGSC0003DMP400001944
PGSC0003DMT400002679	PGSC0003DMG400001033	PGSC0003DMP400001945
PGSC0003DMT400002684	PGSC0003DMG400001035	PGSC0003DMP400001948
PGSC0003DMT400002688	PGSC0003DMG400001036	PGSC0003DMP400001949
PGSC0003DMT400002692	PGSC0003DMG400001038	PGSC0003DMP400001951
PGSC0003DMT400002693	PGSC0003DMG400001039	PGSC0003DMP400001952
PGSC0003DMT400002698	PGSC0003DMG401001040	PGSC0003DMP400001954
PGSC0003DMT400002699	PGSC0003DMG402001040	PGSC0003DMP400001955
PGSC0003DMT400002701	PGSC0003DMG400001041	PGSC0003DMP400001956
PGSC0003DMT400002711	PGSC0003DMG400001042	PGSC0003DMP400001962
PGSC0003DMT400002719	PGSC0003DMG400001047	PGSC0003DMP400001965
PGSC0003DMT400002722	PGSC0003DMG400001048	PGSC0003DMP400001967
PGSC0003DMT400002723	PGSC0003DMG400001049	PGSC0003DMP400001968
PGSC0003DMT400002726	PGSC0003DMG400001052	PGSC0003DMP400001969
PGSC0003DMT400002727	PGSC0003DMG400001053	PGSC0003DMP400001970
PGSC0003DMT400002733	PGSC0003DMG400001057	PGSC0003DMP400001974
PGSC0003DMT400002734	PGSC0003DMG400001058	PGSC0003DMP400001975
PGSC0003DMT400002736	PGSC0003DMG400001059	PGSC0003DMP400001977
PGSC0003DMT400002738	PGSC0003DMG400001060	PGSC0003DMP400001978
PGSC0003DMT400002741	PGSC0003DMG400001063	PGSC0003DMP400001981
PGSC0003DMT400002743	PGSC0003DMG400001064	PGSC0003DMP400001983
PGSC0003DMT400002745	PGSC0003DMG400001065	PGSC0003DMP400001984
PGSC0003DMT400002746	PGSC0003DMG400001066	PGSC0003DMP400001985
PGSC0003DMT400002750	PGSC0003DMG400001067	PGSC0003DMP400001988
PGSC0003DMT400002755	PGSC0003DMG400001069	PGSC0003DMP400001992
PGSC0003DMT400002762	PGSC0003DMG400001070	PGSC0003DMP400001999
PGSC0003DMT400002767	PGSC0003DMG400001071	PGSC0003DMP400002001
PGSC0003DMT400002768	PGSC0003DMG400001072	PGSC0003DMP400002002
PGSC0003DMT400002770	PGSC0003DMG400001074	PGSC0003DMP400002004
PGSC0003DMT400002771	PGSC0003DMG400001075	PGSC0003DMP400002005
PGSC0003DMT400002773	PGSC0003DMG400001076	PGSC0003DMP400002006
PGSC0003DMT400002777	PGSC0003DMG400001077	PGSC0003DMP400002007
PGSC0003DMT400002779	PGSC0003DMG400001078	PGSC0003DMP400002008
PGSC0003DMT400002782	PGSC0003DMG400001079	PGSC0003DMP400002011
PGSC0003DMT400002787	PGSC0003DMG400001080	PGSC0003DMP400002015
PGSC0003DMT400002789	PGSC0003DMG400001082	PGSC0003DMP400002017
PGSC0003DMT400002790	PGSC0003DMG400001083	PGSC0003DMP400002018
PGSC0003DMT400002793	PGSC0003DMG400001084	PGSC0003DMP400002020
PGSC0003DMT400002796	PGSC0003DMG400001086	PGSC0003DMP400002022
PGSC0003DMT400002802	PGSC0003DMG400001089	PGSC0003DMP400002025
PGSC0003DMT400002805	PGSC0003DMG400001090	PGSC0003DMP400002028
PGSC0003DMT400002807	PGSC0003DMG400001091	PGSC0003DMP400002030
PGSC0003DMT400002808	PGSC0003DMG400001092	PGSC0003DMP400002031
PGSC0003DMT400002810	PGSC0003DMG400001094	PGSC0003DMP400002033
PGSC0003DMT400002812	PGSC0003DMG401001095	PGSC0003DMP400002035
PGSC0003DMT400002814	PGSC0003DMG402001095	PGSC0003DMP400002037
PGSC0003DMT400002816	PGSC0003DMG400001096	PGSC0003DMP400002039
PGSC0003DMT400002817	PGSC0003DMG400001097	PGSC0003DMP400002040
PGSC0003DMT400002818	PGSC0003DMG400001098	PGSC0003DMP400002041
PGSC0003DMT400002820	PGSC0003DMG400001099	PGSC0003DMP400002042
PGSC0003DMT400002822	PGSC0003DMG400001100	PGSC0003DMP400002043
PGSC0003DMT400002830	PGSC0003DMG400001105	PGSC0003DMP400002048
PGSC0003DMT400002837	PGSC0003DMG400001108	PGSC0003DMP400002052
PGSC0003DMT400002842	PGSC0003DMG400001110	PGSC0003DMP400002057
PGSC0003DMT400002858	PGSC0003DMG400001114	PGSC0003DMP400002065
PGSC0003DMT400002859	PGSC0003DMG400001115	PGSC0003DMP400002066
PGSC0003DMT400002861	PGSC0003DMG401001116	PGSC0003DMP400002068
PGSC0003DMT400002862	PGSC0003DMG402001116	PGSC0003DMP400002069
PGSC0003DMT400002866	PGSC0003DMG400001117	PGSC0003DMP400002073
PGSC0003DMT400002869	PGSC0003DMG400001118	PGSC0003DMP400002076
PGSC0003DMT400002870	PGSC0003DMG400001119	PGSC0003DMP400002077
PGSC0003DMT400002872	PGSC0003DMG400001120	PGSC0003DMP400002079
PGSC0003DMT400002874	PGSC0003DMG400001121	PGSC0003DMP400002081
PGSC0003DMT400002877	PGSC0003DMG400001123	PGSC0003DMP400002084
PGSC0003DMT400002883	PGSC0003DMG400001126	PGSC0003DMP400002089
PGSC0003DMT400002887	PGSC0003DMG400001127	PGSC0003DMP400002092
PGSC0003DMT400002890	PGSC0003DMG400001128	PGSC0003DMP400002095
PGSC0003DMT400002891	PGSC0003DMG400001129	PGSC0003DMP400002096
PGSC0003DMT400002893	PGSC0003DMG400001130	PGSC0003DMP400002098
PGSC0003DMT400002898	PGSC0003DMG400001131	PGSC0003DMP400002100
PGSC0003DMT400002899	PGSC0003DMG401001132	PGSC0003DMP400002101
PGSC0003DMT400002900	PGSC0003DMG402001132	PGSC0003DMP400002102
PGSC0003DMT400002906	PGSC0003DMG400001136	PGSC0003DMP400002107
PGSC0003DMT400002908	PGSC0003DMG400001137	PGSC0003DMP400002109
PGSC0003DMT400002919	PGSC0003DMG400001142	PGSC0003DMP400002113
PGSC0003DMT400002923	PGSC0003DMG400001144	PGSC0003DMP400002116
PGSC0003DMT400002927	PGSC0003DMG400001146	PGSC0003DMP400002118
PGSC0003DMT400002931	PGSC0003DMG400001147	PGSC0003DMP400002122
PGSC0003DMT400002933	PGSC0003DMG400001148	PGSC0003DMP400002124
PGSC0003DMT400002934	PGSC0003DMG400001149	PGSC0003DMP400002125
PGSC0003DMT400002935	PGSC0003DMG400001150	PGSC0003DMP400002126
PGSC0003DMT400002947	PGSC0003DMG400001152	PGSC0003DMP400002132
PGSC0003DMT400002949	PGSC0003DMG400001153	PGSC0003DMP400002134
PGSC0003DMT400002951	PGSC0003DMG400001154	PGSC0003DMP400002135
PGSC0003DMT400002955	PGSC0003DMG400001155	PGSC0003DMP400002136
PGSC0003DMT400002958	PGSC0003DMG400001157	PGSC0003DMP400002137
PGSC0003DMT400002959	PGSC0003DMG400001158	PGSC0003DMP400002138
PGSC0003DMT400002960	PGSC0003DMG401001159	PGSC0003DMP400002139
PGSC0003DMT400002961	PGSC0003DMG402001159	PGSC0003DMP400002140
PGSC0003DMT400002962	PGSC0003DMG400001160	PGSC0003DMP400002141
PGSC0003DMT400002963	PGSC0003DMG400001161	PGSC0003DMP400002142
PGSC0003DMT400002964	PGSC0003DMG400001162	PGSC0003DMP400002143
PGSC0003DMT400002985	PGSC0003DMG400001174	PGSC0003DMP400002154
PGSC0003DMT400002991	PGSC0003DMG400001178	PGSC0003DMP400002158
PGSC0003DMT400002994	PGSC0003DMG400001179	PGSC0003DMP400002160
PGSC0003DMT400002997	PGSC0003DMG400001180	PGSC0003DMP400002162
PGSC0003DMT400003000	PGSC0003DMG400001181	PGSC0003DMP400002164
PGSC0003DMT400003001	PGSC0003DMG400001182	PGSC0003DMP400002165
PGSC0003DMT400003004	PGSC0003DMG400001183	PGSC0003DMP400002168
PGSC0003DMT400003005	PGSC0003DMG400001184	PGSC0003DMP400002169
PGSC0003DMT400003009	PGSC0003DMG400001188	PGSC0003DMP400002172
PGSC0003DMT400003010	PGSC0003DMG400001189	PGSC0003DMP400002173
PGSC0003DMT400003012	PGSC0003DMG400001190	PGSC0003DMP400002175
PGSC0003DMT400003013	PGSC0003DMG400001191	PGSC0003DMP400002176
PGSC0003DMT400003016	PGSC0003DMG400001193	PGSC0003DMP400002179
PGSC0003DMT400003017	PGSC0003DMG400001194	PGSC0003DMP400002180
PGSC0003DMT400003018	PGSC0003DMG400001195	PGSC0003DMP400002181
PGSC0003DMT400003021	PGSC0003DMG400001197	PGSC0003DMP400002184
PGSC0003DMT400003025	PGSC0003DMG400001199	PGSC0003DMP400002186
PGSC0003DMT400003034	PGSC0003DMG400001201	PGSC0003DMP400002195
PGSC0003DMT400003036	PGSC0003DMG400001203	PGSC0003DMP400002196
PGSC0003DMT400003037	PGSC0003DMG400001204	PGSC0003DMP400002197
PGSC0003DMT400003038	PGSC0003DMG400001205	PGSC0003DMP400002198
PGSC0003DMT400003039	PGSC0003DMG400001206	PGSC0003DMP400002199
PGSC0003DMT400003049	PGSC0003DMG400001209	PGSC0003DMP400002202
PGSC0003DMT400003054	PGSC0003DMG400001211	PGSC0003DMP400002205
PGSC0003DMT400003061	PGSC0003DMG400001213	PGSC0003DMP400002208
PGSC0003DMT400003064	PGSC0003DMG400001215	PGSC0003DMP400002210
PGSC0003DMT400003071	PGSC0003DMG400001218	PGSC0003DMP400002213
PGSC0003DMT400003078	PGSC0003DMG400001221	PGSC0003DMP400002216
PGSC0003DMT400003087	PGSC0003DMG400001226	PGSC0003DMP400002223
PGSC0003DMT400003089	PGSC0003DMG400001227	PGSC0003DMP400002225
PGSC0003DMT400003091	PGSC0003DMG400001228	PGSC0003DMP400002226
PGSC0003DMT400003095	PGSC0003DMG400001229	PGSC0003DMP400002229
PGSC0003DMT400003096	PGSC0003DMG400001230	PGSC0003DMP400002230
PGSC0003DMT400003100	PGSC0003DMG400001232	PGSC0003DMP400002233
PGSC0003DMT400003101	PGSC0003DMG400001233	PGSC0003DMP400002234
PGSC0003DMT400003102	PGSC0003DMG400001234	PGSC0003DMP400002235
PGSC0003DMT400003104	PGSC0003DMG401001235	PGSC0003DMP400002236
PGSC0003DMT400003105	PGSC0003DMG402001235	PGSC0003DMP400002237
PGSC0003DMT400003131	PGSC0003DMG400001242	PGSC0003DMP400002250
PGSC0003DMT400003134	PGSC0003DMG400001243	PGSC0003DMP400002251
PGSC0003DMT400003138	PGSC0003DMG400001244	PGSC0003DMP400002252
PGSC0003DMT400003151	PGSC0003DMG400001246	PGSC0003DMP400002261
PGSC0003DMT400003152	PGSC0003DMG400001247	PGSC0003DMP400002262
PGSC0003DMT400003153	PGSC0003DMG401001248	PGSC0003DMP400002263
PGSC0003DMT400003157	PGSC0003DMG402001248	PGSC0003DMP400002266
PGSC0003DMT400003166	PGSC0003DMG400001252	PGSC0003DMP400002269
PGSC0003DMT400003174	PGSC0003DMG400001256	PGSC0003DMP400002274
PGSC0003DMT400003181	PGSC0003DMG400001258	PGSC0003DMP400002278
PGSC0003DMT400003185	PGSC0003DMG400001259	PGSC0003DMP400002281
PGSC0003DMT400003202	PGSC0003DMG400001265	PGSC0003DMP400002289
PGSC0003DMT400003203	PGSC0003DMG400001266	PGSC0003DMP400002290
PGSC0003DMT400003207	PGSC0003DMG400001267	PGSC0003DMP400002291
PGSC0003DMT400003214	PGSC0003DMG400001268	PGSC0003DMP400002293
PGSC0003DMT400003226	PGSC0003DMG400001272	PGSC0003DMP400002297
PGSC0003DMT400003228	PGSC0003DMG400001274	PGSC0003DMP400002299
PGSC0003DMT400003234	PGSC0003DMG400001278	PGSC0003DMP400002305
PGSC0003DMT400003243	PGSC0003DMG400001283	PGSC0003DMP400002309
PGSC0003DMT400003249	PGSC0003DMG400001286	PGSC0003DMP400002311
PGSC0003DMT400003250	PGSC0003DMG400001287	PGSC0003DMP400002312
PGSC0003DMT400003253	PGSC0003DMG400001288	PGSC0003DMP400002315
PGSC0003DMT400003257	PGSC0003DMG400001290	PGSC0003DMP400002317
PGSC0003DMT400003261	PGSC0003DMG400001291	PGSC0003DMP400002318
PGSC0003DMT400003262	PGSC0003DMG400001292	PGSC0003DMP400002319
PGSC0003DMT400003263	PGSC0003DMG400001293	PGSC0003DMP400002320
PGSC0003DMT400003267	PGSC0003DMG400001295	PGSC0003DMP400002323
PGSC0003DMT400003269	PGSC0003DMG400001296	PGSC0003DMP400002325
PGSC0003DMT400003273	PGSC0003DMG400001298	PGSC0003DMP400002328
PGSC0003DMT400003274	PGSC0003DMG400001299	PGSC0003DMP400002329
PGSC0003DMT400003275	PGSC0003DMG400001300	PGSC0003DMP400002330
PGSC0003DMT400003278	PGSC0003DMG400001301	PGSC0003DMP400002331
PGSC0003DMT400003279	PGSC0003DMG400001302	PGSC0003DMP400002332
PGSC0003DMT400003282	PGSC0003DMG400001303	PGSC0003DMP400002333
PGSC0003DMT400003284	PGSC0003DMG400001304	PGSC0003DMP400002334
PGSC0003DMT400003288	PGSC0003DMG400001306	PGSC0003DMP400002336
PGSC0003DMT400003290	PGSC0003DMG400001307	PGSC0003DMP400002338
PGSC0003DMT400003291	PGSC0003DMG401001308	PGSC0003DMP400002339
PGSC0003DMT400003292	PGSC0003DMG402001308	PGSC0003DMP400002340
PGSC0003DMT400003295	PGSC0003DMG401001309	PGSC0003DMP400002342
PGSC0003DMT400003298	PGSC0003DMG402001309	PGSC0003DMP400002343
PGSC0003DMT400003302	PGSC0003DMG403001309	PGSC0003DMP400002346
PGSC0003DMT400003309	PGSC0003DMG400001310	PGSC0003DMP400002348
PGSC0003DMT400003310	PGSC0003DMG400001311	PGSC0003DMP400002349
PGSC0003DMT400003312	PGSC0003DMG400001312	PGSC0003DMP400002350
PGSC0003DMT400003317	PGSC0003DMG400001313	PGSC0003DMP400002353
PGSC0003DMT400003320	PGSC0003DMG400001314	PGSC0003DMP400002356
PGSC0003DMT400003322	PGSC0003DMG400001315	PGSC0003DMP400002357
PGSC0003DMT400003327	PGSC0003DMG401001316	PGSC0003DMP400002362
PGSC0003DMT400003328	PGSC0003DMG402001316	PGSC0003DMP400002363
PGSC0003DMT400003329	PGSC0003DMG403001316	PGSC0003DMP400002364
PGSC0003DMT400003330	PGSC0003DMG400001317	PGSC0003DMP400002365
PGSC0003DMT400003334	PGSC0003DMG400001319	PGSC0003DMP400002367
PGSC0003DMT400003336	PGSC0003DMG400001320	PGSC0003DMP400002369
PGSC0003DMT400003338	PGSC0003DMG400001321	PGSC0003DMP400002371
PGSC0003DMT400003340	PGSC0003DMG400001322	PGSC0003DMP400002373
PGSC0003DMT400003346	PGSC0003DMG400001324	PGSC0003DMP400002377
PGSC0003DMT400003347	PGSC0003DMG400001325	PGSC0003DMP400002378
PGSC0003DMT400003351	PGSC0003DMG400001326	PGSC0003DMP400002381
PGSC0003DMT400003353	PGSC0003DMG400001327	PGSC0003DMP400002382
PGSC0003DMT400003356	PGSC0003DMG400001328	PGSC0003DMP400002384
PGSC0003DMT400003357	PGSC0003DMG400001329	PGSC0003DMP400002385
PGSC0003DMT400003359	PGSC0003DMG400001330	PGSC0003DMP400002386
PGSC0003DMT400003361	PGSC0003DMG400001331	PGSC0003DMP400002388
PGSC0003DMT400003364	PGSC0003DMG400001333	PGSC0003DMP400002390
PGSC0003DMT400003371	PGSC0003DMG400001335	PGSC0003DMP400002393
PGSC0003DMT400003380	PGSC0003DMG400001338	PGSC0003DMP400002396
PGSC0003DMT400003382	PGSC0003DMG400001339	PGSC0003DMP400002398
PGSC0003DMT400003384	PGSC0003DMG400001340	PGSC0003DMP400002400
PGSC0003DMT400003387	PGSC0003DMG401001341	PGSC0003DMP400002402
PGSC0003DMT400003391	PGSC0003DMG402001341	PGSC0003DMP400002406
PGSC0003DMT400003397	PGSC0003DMG403001341	PGSC0003DMP400002412
PGSC0003DMT400003398	PGSC0003DMG404001341	PGSC0003DMP400002413
PGSC0003DMT400003401	PGSC0003DMG400001342	PGSC0003DMP400002416
PGSC0003DMT400003407	PGSC0003DMG400001344	PGSC0003DMP400002422
PGSC0003DMT400003408	PGSC0003DMG400001345	PGSC0003DMP400002423
PGSC0003DMT400003409	PGSC0003DMG401001346	PGSC0003DMP400002424
PGSC0003DMT400003411	PGSC0003DMG402001346	PGSC0003DMP400002426
PGSC0003DMT400003412	PGSC0003DMG401001347	PGSC0003DMP400002427
PGSC0003DMT400003414	PGSC0003DMG402001347	PGSC0003DMP400002429
PGSC0003DMT400003418	PGSC0003DMG400001349	PGSC0003DMP400002431
PGSC0003DMT400003423	PGSC0003DMG400001350	PGSC0003DMP400002433
PGSC0003DMT400003426	PGSC0003DMG400001351	PGSC0003DMP400002436
PGSC0003DMT400003429	PGSC0003DMG400001352	PGSC0003DMP400002438
PGSC0003DMT400003433	PGSC0003DMG400001353	PGSC0003DMP400002441
PGSC0003DMT400003434	PGSC0003DMG400001354	PGSC0003DMP400002442
PGSC0003DMT400003437	PGSC0003DMG400001355	PGSC0003DMP400002445
PGSC0003DMT400003443	PGSC0003DMG400001358	PGSC0003DMP400002449
PGSC0003DMT400003445	PGSC0003DMG400001359	PGSC0003DMP400002450
PGSC0003DMT400003446	PGSC0003DMG400001360	PGSC0003DMP400002451
PGSC0003DMT400003451	PGSC0003DMG400001361	PGSC0003DMP400002456
PGSC0003DMT400003454	PGSC0003DMG400001362	PGSC0003DMP400002458
PGSC0003DMT400003455	PGSC0003DMG400001363	PGSC0003DMP400002459
PGSC0003DMT400003457	PGSC0003DMG400001364	PGSC0003DMP400002460
PGSC0003DMT400003458	PGSC0003DMG400001365	PGSC0003DMP400002461
PGSC0003DMT400003459	PGSC0003DMG400001366	PGSC0003DMP400002462
PGSC0003DMT400003460	PGSC0003DMG400001367	PGSC0003DMP400002463
PGSC0003DMT400003461	PGSC0003DMG400001368	PGSC0003DMP400002464
PGSC0003DMT400003464	PGSC0003DMG400001369	PGSC0003DMP400002467
PGSC0003DMT400003467	PGSC0003DMG400001370	PGSC0003DMP400002469
PGSC0003DMT400003470	PGSC0003DMG400001371	PGSC0003DMP400002471
PGSC0003DMT400003472	PGSC0003DMG400001372	PGSC0003DMP400002473
PGSC0003DMT400003474	PGSC0003DMG400001373	PGSC0003DMP400002475
PGSC0003DMT400003477	PGSC0003DMG400001374	PGSC0003DMP400002478
PGSC0003DMT400003478	PGSC0003DMG400001375	PGSC0003DMP400002479
PGSC0003DMT400003483	PGSC0003DMG400001377	PGSC0003DMP400002481
PGSC0003DMT400003485	PGSC0003DMG400001378	PGSC0003DMP400002483
PGSC0003DMT400003486	PGSC0003DMG400001379	PGSC0003DMP400002484
PGSC0003DMT400003487	PGSC0003DMG400001380	PGSC0003DMP400002485
PGSC0003DMT400003490	PGSC0003DMG401001381	PGSC0003DMP400002487
PGSC0003DMT400003494	PGSC0003DMG402001381	PGSC0003DMP400002488
PGSC0003DMT400003496	PGSC0003DMG400001382	PGSC0003DMP400002490
PGSC0003DMT400003501	PGSC0003DMG401001383	PGSC0003DMP400002494
PGSC0003DMT400003507	PGSC0003DMG402001383	PGSC0003DMP400002500
PGSC0003DMT400003509	PGSC0003DMG401001384	PGSC0003DMP400002502
PGSC0003DMT400003511	PGSC0003DMG402001384	PGSC0003DMP400002504
PGSC0003DMT400003515	PGSC0003DMG400001386	PGSC0003DMP400002506
PGSC0003DMT400003516	PGSC0003DMG400001387	PGSC0003DMP400002507
PGSC0003DMT400003517	PGSC0003DMG400001388	PGSC0003DMP400002508
PGSC0003DMT400003520	PGSC0003DMG400001389	PGSC0003DMP400002510
PGSC0003DMT400003521	PGSC0003DMG400001390	PGSC0003DMP400002511
PGSC0003DMT400003527	PGSC0003DMG400001391	PGSC0003DMP400002517
PGSC0003DMT400003528	PGSC0003DMG400001392	PGSC0003DMP400002518
PGSC0003DMT400003532	PGSC0003DMG400001393	PGSC0003DMP400002522
PGSC0003DMT400003533	PGSC0003DMG400001394	PGSC0003DMP400002523
PGSC0003DMT400003534	PGSC0003DMG400001395	PGSC0003DMP400002524
PGSC0003DMT400003537	PGSC0003DMG400001396	PGSC0003DMP400002525
PGSC0003DMT400003538	PGSC0003DMG400001397	PGSC0003DMP400002526
PGSC0003DMT400003545	PGSC0003DMG400001399	PGSC0003DMP400002530
PGSC0003DMT400003546	PGSC0003DMG400001400	PGSC0003DMP400002531
PGSC0003DMT400003548	PGSC0003DMG401001401	PGSC0003DMP400002533
PGSC0003DMT400003550	PGSC0003DMG400001402	PGSC0003DMP400002535
PGSC0003DMT400003551	PGSC0003DMG400001403	PGSC0003DMP400002536
PGSC0003DMT400003553	PGSC0003DMG400001404	PGSC0003DMP400002537
PGSC0003DMT400003558	PGSC0003DMG400001406	PGSC0003DMP400002539
PGSC0003DMT400003562	PGSC0003DMG400001408	PGSC0003DMP400002541
PGSC0003DMT400003564	PGSC0003DMG400001410	PGSC0003DMP400002542
PGSC0003DMT400003568	PGSC0003DMG400001411	PGSC0003DMP400002546
PGSC0003DMT400003573	PGSC0003DMG400001413	PGSC0003DMP400002550
PGSC0003DMT400003579	PGSC0003DMG400001414	PGSC0003DMP400002552
PGSC0003DMT400003581	PGSC0003DMG400001415	PGSC0003DMP400002554
PGSC0003DMT400003585	PGSC0003DMG400001417	PGSC0003DMP400002557
PGSC0003DMT400003587	PGSC0003DMG400001418	PGSC0003DMP400002559
PGSC0003DMT400003590	PGSC0003DMG400001419	PGSC0003DMP400002562
PGSC0003DMT400003592	PGSC0003DMG400001421	PGSC0003DMP400002563
PGSC0003DMT400003596	PGSC0003DMG400001422	PGSC0003DMP400002565
PGSC0003DMT400003600	PGSC0003DMG400001423	PGSC0003DMP400002569
PGSC0003DMT400003601	PGSC0003DMG400001424	PGSC0003DMP400002570
PGSC0003DMT400003602	PGSC0003DMG400001425	PGSC0003DMP400002571
PGSC0003DMT400003608	PGSC0003DMG400001426	PGSC0003DMP400002572
PGSC0003DMT400003611	PGSC0003DMG400001427	PGSC0003DMP400002573
PGSC0003DMT400003616	PGSC0003DMG400001428	PGSC0003DMP400002578
PGSC0003DMT400003629	PGSC0003DMG400001430	PGSC0003DMP400002590
PGSC0003DMT400003630	PGSC0003DMG400001431	PGSC0003DMP400002591
PGSC0003DMT400003632	PGSC0003DMG400001432	PGSC0003DMP400002593
PGSC0003DMT400003634	PGSC0003DMG400001433	PGSC0003DMP400002595
PGSC0003DMT400003637	PGSC0003DMG400001434	PGSC0003DMP400002598
PGSC0003DMT400003638	PGSC0003DMG400001435	PGSC0003DMP400002599
PGSC0003DMT400003639	PGSC0003DMG400001436	PGSC0003DMP400002600
PGSC0003DMT400003642	PGSC0003DMG400001437	PGSC0003DMP400002601
PGSC0003DMT400003643	PGSC0003DMG400001438	PGSC0003DMP400002602
PGSC0003DMT400003648	PGSC0003DMG400001440	PGSC0003DMP400002606
PGSC0003DMT400003651	PGSC0003DMG400001441	PGSC0003DMP400002609
PGSC0003DMT400003652	PGSC0003DMG400001442	PGSC0003DMP400002610
PGSC0003DMT400003654	PGSC0003DMG400001443	PGSC0003DMP400002612
PGSC0003DMT400003657	PGSC0003DMG400001444	PGSC0003DMP400002614
PGSC0003DMT400003663	PGSC0003DMG400001447	PGSC0003DMP400002619
PGSC0003DMT400003666	PGSC0003DMG400001448	PGSC0003DMP400002620
PGSC0003DMT400003667	PGSC0003DMG400001449	PGSC0003DMP400002621
PGSC0003DMT400003672	PGSC0003DMG400001451	PGSC0003DMP400002625
PGSC0003DMT400003683	PGSC0003DMG400001452	PGSC0003DMP400002634
PGSC0003DMT400003685	PGSC0003DMG400001453	PGSC0003DMP400002636
PGSC0003DMT400003687	PGSC0003DMG400001454	PGSC0003DMP400002637
PGSC0003DMT400003690	PGSC0003DMG400001455	PGSC0003DMP400002640
PGSC0003DMT400003706	PGSC0003DMG400001459	PGSC0003DMP400002644
PGSC0003DMT400003712	PGSC0003DMG400001460	PGSC0003DMP400002648
PGSC0003DMT400003713	PGSC0003DMG400001461	PGSC0003DMP400002649
PGSC0003DMT400003717	PGSC0003DMG400001462	PGSC0003DMP400002653
PGSC0003DMT400003718	PGSC0003DMG400001463	PGSC0003DMP400002654
PGSC0003DMT400003719	PGSC0003DMG400001464	PGSC0003DMP400002655
PGSC0003DMT400003723	PGSC0003DMG400001465	PGSC0003DMP400002658
PGSC0003DMT400003724	PGSC0003DMG400001466	PGSC0003DMP400002659
PGSC0003DMT400003727	PGSC0003DMG400001467	PGSC0003DMP400002662
PGSC0003DMT400003731	PGSC0003DMG400001469	PGSC0003DMP400002666
PGSC0003DMT400003734	PGSC0003DMG400001470	PGSC0003DMP400002669
PGSC0003DMT400003737	PGSC0003DMG400001472	PGSC0003DMP400002671
PGSC0003DMT400003739	PGSC0003DMG400001473	PGSC0003DMP400002673
PGSC0003DMT400003740	PGSC0003DMG400001474	PGSC0003DMP400002674
PGSC0003DMT400003749	PGSC0003DMG400001476	PGSC0003DMP400002677
PGSC0003DMT400003750	PGSC0003DMG400001477	PGSC0003DMP400002678
PGSC0003DMT400003751	PGSC0003DMG400001478	PGSC0003DMP400002679
PGSC0003DMT400003752	PGSC0003DMG400001479	PGSC0003DMP400002680
PGSC0003DMT400003763	PGSC0003DMG400001490	PGSC0003DMP400002685
PGSC0003DMT400003768	PGSC0003DMG401001493	PGSC0003DMP400002687
PGSC0003DMT400003771	PGSC0003DMG402001493	PGSC0003DMP400002690
PGSC0003DMT400003773	PGSC0003DMG401001494	PGSC0003DMP400002692
PGSC0003DMT400003774	PGSC0003DMG402001494	PGSC0003DMP400002693
PGSC0003DMT400003777	PGSC0003DMG400001495	PGSC0003DMP400002694
PGSC0003DMT400003781	PGSC0003DMG400001496	PGSC0003DMP400002696
PGSC0003DMT400003782	PGSC0003DMG400001497	PGSC0003DMP400002697
PGSC0003DMT400003784	PGSC0003DMG400001498	PGSC0003DMP400002698
PGSC0003DMT400003790	PGSC0003DMG400001501	PGSC0003DMP400002702
PGSC0003DMT400003794	PGSC0003DMG400001502	PGSC0003DMP400002705
PGSC0003DMT400003795	PGSC0003DMG400001503	PGSC0003DMP400002706
PGSC0003DMT400003796	PGSC0003DMG400001504	PGSC0003DMP400002707
PGSC0003DMT400003805	PGSC0003DMG400001508	PGSC0003DMP400002712
PGSC0003DMT400003810	PGSC0003DMG400001509	PGSC0003DMP400002716
PGSC0003DMT400003812	PGSC0003DMG400001510	PGSC0003DMP400002717
PGSC0003DMT400003813	PGSC0003DMG400001511	PGSC0003DMP400002718
PGSC0003DMT400003817	PGSC0003DMG400001512	PGSC0003DMP400002721
PGSC0003DMT400003819	PGSC0003DMG400001513	PGSC0003DMP400002722
PGSC0003DMT400003820	PGSC0003DMG400001514	PGSC0003DMP400002723
PGSC0003DMT400003822	PGSC0003DMG400001515	PGSC0003DMP400002725
PGSC0003DMT400003823	PGSC0003DMG400001516	PGSC0003DMP400002726
PGSC0003DMT400003838	PGSC0003DMG400001518	PGSC0003DMP400002733
PGSC0003DMT400003844	PGSC0003DMG400001519	PGSC0003DMP400002736
PGSC0003DMT400003846	PGSC0003DMG400001520	PGSC0003DMP400002738
PGSC0003DMT400003853	PGSC0003DMG401001521	PGSC0003DMP400002743
PGSC0003DMT400003860	PGSC0003DMG403001521	PGSC0003DMP400002748
PGSC0003DMT400003867	PGSC0003DMG400001522	PGSC0003DMP400002751
PGSC0003DMT400003868	PGSC0003DMG400001523	PGSC0003DMP400002752
PGSC0003DMT400003869	PGSC0003DMG400001524	PGSC0003DMP400002753
PGSC0003DMT400003870	PGSC0003DMG400001525	PGSC0003DMP400002754
PGSC0003DMT400003877	PGSC0003DMG400001528	PGSC0003DMP400002757
PGSC0003DMT400003878	PGSC0003DMG400001529	PGSC0003DMP400002758
PGSC0003DMT400003883	PGSC0003DMG401001531	PGSC0003DMP400002762
PGSC0003DMT400003888	PGSC0003DMG402001531	PGSC0003DMP400002766
PGSC0003DMT400003892	PGSC0003DMG400001534	PGSC0003DMP400002769
PGSC0003DMT400003898	PGSC0003DMG400001538	PGSC0003DMP400002773
PGSC0003DMT400003907	PGSC0003DMG400001543	PGSC0003DMP400002778
PGSC0003DMT400003908	PGSC0003DMG400001544	PGSC0003DMP400002779
PGSC0003DMT400003911	PGSC0003DMG400001545	PGSC0003DMP400002782
PGSC0003DMT400003919	PGSC0003DMG400001546	PGSC0003DMP400002788
PGSC0003DMT400003920	PGSC0003DMG400001547	PGSC0003DMP400002789
PGSC0003DMT400003923	PGSC0003DMG402001548	PGSC0003DMP400002792
PGSC0003DMT400003925	PGSC0003DMG401001548	PGSC0003DMP400002794
PGSC0003DMT400003929	PGSC0003DMG403001548	PGSC0003DMP400002798
PGSC0003DMT400003932	PGSC0003DMG404001548	PGSC0003DMP400002799
PGSC0003DMT400003933	PGSC0003DMG400001549	PGSC0003DMP400002800
PGSC0003DMT400003934	PGSC0003DMG400001550	PGSC0003DMP400002801
PGSC0003DMT400003940	PGSC0003DMG400001551	PGSC0003DMP400002807
PGSC0003DMT400003942	PGSC0003DMG402001552	PGSC0003DMP400002809
PGSC0003DMT400003947	PGSC0003DMG401001552	PGSC0003DMP400002814
PGSC0003DMT400003950	PGSC0003DMG400001554	PGSC0003DMP400002816
PGSC0003DMT400003951	PGSC0003DMG400001555	PGSC0003DMP400002817
PGSC0003DMT400003954	PGSC0003DMG400001556	PGSC0003DMP400002820
PGSC0003DMT400003956	PGSC0003DMG400001557	PGSC0003DMP400002821
PGSC0003DMT400003957	PGSC0003DMG400001558	PGSC0003DMP400002822
PGSC0003DMT400003958	PGSC0003DMG400001559	PGSC0003DMP400002823
PGSC0003DMT400003959	PGSC0003DMG400001560	PGSC0003DMP400002824
PGSC0003DMT400003969	PGSC0003DMG400001562	PGSC0003DMP400002834
PGSC0003DMT400003980	PGSC0003DMG400001565	PGSC0003DMP400002839
PGSC0003DMT400003982	PGSC0003DMG400001566	PGSC0003DMP400002841
PGSC0003DMT400003983	PGSC0003DMG400001567	PGSC0003DMP400002842
PGSC0003DMT400003985	PGSC0003DMG400001569	PGSC0003DMP400002844
PGSC0003DMT400003986	PGSC0003DMG400001570	PGSC0003DMP400002845
PGSC0003DMT400003987	PGSC0003DMG400001571	PGSC0003DMP400002846
PGSC0003DMT400003992	PGSC0003DMG400001573	PGSC0003DMP400002851
PGSC0003DMT400003995	PGSC0003DMG400001574	PGSC0003DMP400002853
PGSC0003DMT400003998	PGSC0003DMG400001576	PGSC0003DMP400002856
PGSC0003DMT400004001	PGSC0003DMG400001577	PGSC0003DMP400002859
PGSC0003DMT400004007	PGSC0003DMG400001578	PGSC0003DMP400002865
PGSC0003DMT400004010	PGSC0003DMG400001579	PGSC0003DMP400002867
PGSC0003DMT400004013	PGSC0003DMG400001580	PGSC0003DMP400002870
PGSC0003DMT400004016	PGSC0003DMG400001581	PGSC0003DMP400002873
PGSC0003DMT400004027	PGSC0003DMG400001589	PGSC0003DMP400002880
PGSC0003DMT400004028	PGSC0003DMG400001590	PGSC0003DMP400002881
PGSC0003DMT400004030	PGSC0003DMG400001591	PGSC0003DMP400002882
PGSC0003DMT400004034	PGSC0003DMG400001593	PGSC0003DMP400002883
PGSC0003DMT400004039	PGSC0003DMG400001594	PGSC0003DMP400002887
PGSC0003DMT400004042	PGSC0003DMG400001595	PGSC0003DMP400002889
PGSC0003DMT400004043	PGSC0003DMG400001596	PGSC0003DMP400002890
PGSC0003DMT400004045	PGSC0003DMG400001597	PGSC0003DMP400002892
PGSC0003DMT400004046	PGSC0003DMG400001598	PGSC0003DMP400002893
PGSC0003DMT400004049	PGSC0003DMG400001599	PGSC0003DMP400002895
PGSC0003DMT400004060	PGSC0003DMG400001601	PGSC0003DMP400002901
PGSC0003DMT400004063	PGSC0003DMG400001604	PGSC0003DMP400002904
PGSC0003DMT400004068	PGSC0003DMG400001606	PGSC0003DMP400002909
PGSC0003DMT400004070	PGSC0003DMG400001607	PGSC0003DMP400002911
PGSC0003DMT400004073	PGSC0003DMG400001609	PGSC0003DMP400002913
PGSC0003DMT400004074	PGSC0003DMG401001610	PGSC0003DMP400002914
PGSC0003DMT400004084	PGSC0003DMG402001610	PGSC0003DMP400002923
PGSC0003DMT400004086	PGSC0003DMG400001611	PGSC0003DMP400002925
PGSC0003DMT400004087	PGSC0003DMG400001612	PGSC0003DMP400002926
PGSC0003DMT400004088	PGSC0003DMG400001613	PGSC0003DMP400002927
PGSC0003DMT400004089	PGSC0003DMG400001614	PGSC0003DMP400002928
PGSC0003DMT400004090	PGSC0003DMG400001615	PGSC0003DMP400002929
PGSC0003DMT400004092	PGSC0003DMG400001616	PGSC0003DMP400002931
PGSC0003DMT400004094	PGSC0003DMG400001617	PGSC0003DMP400002932
PGSC0003DMT400004095	PGSC0003DMG400001618	PGSC0003DMP400002933
PGSC0003DMT400004104	PGSC0003DMG400001620	PGSC0003DMP400002939
PGSC0003DMT400004106	PGSC0003DMG400001621	PGSC0003DMP400002940
PGSC0003DMT400004107	PGSC0003DMG400001622	PGSC0003DMP400002941
PGSC0003DMT400004111	PGSC0003DMG400001624	PGSC0003DMP400002943
PGSC0003DMT400004112	PGSC0003DMG400001625	PGSC0003DMP400002944
PGSC0003DMT400004117	PGSC0003DMG400001627	PGSC0003DMP400002949
PGSC0003DMT400004120	PGSC0003DMG400001628	PGSC0003DMP400002950
PGSC0003DMT400004121	PGSC0003DMG400001629	PGSC0003DMP400002951
PGSC0003DMT400004125	PGSC0003DMG400001630	PGSC0003DMP400002952
PGSC0003DMT400004126	PGSC0003DMG400001631	PGSC0003DMP400002953
PGSC0003DMT400004129	PGSC0003DMG400001632	PGSC0003DMP400002955
PGSC0003DMT400004130	PGSC0003DMG400001633	PGSC0003DMP400002956
PGSC0003DMT400004132	PGSC0003DMG400001634	PGSC0003DMP400002957
PGSC0003DMT400004133	PGSC0003DMG400001635	PGSC0003DMP400002958
PGSC0003DMT400004137	PGSC0003DMG400001636	PGSC0003DMP400002959
PGSC0003DMT400004142	PGSC0003DMG400001638	PGSC0003DMP400002962
PGSC0003DMT400004146	PGSC0003DMG400001639	PGSC0003DMP400002966
PGSC0003DMT400004151	PGSC0003DMG400001641	PGSC0003DMP400002968
PGSC0003DMT400004154	PGSC0003DMG400001644	PGSC0003DMP400002971
PGSC0003DMT400004155	PGSC0003DMG400001645	PGSC0003DMP400002972
PGSC0003DMT400004156	PGSC0003DMG400001646	PGSC0003DMP400002973
PGSC0003DMT400004159	PGSC0003DMG400001649	PGSC0003DMP400002976
PGSC0003DMT400004165	PGSC0003DMG400001653	PGSC0003DMP400002978
PGSC0003DMT400004170	PGSC0003DMG400001655	PGSC0003DMP400002980
PGSC0003DMT400004171	PGSC0003DMG400001656	PGSC0003DMP400002981
PGSC0003DMT400004172	PGSC0003DMG400001657	PGSC0003DMP400002982
PGSC0003DMT400004176	PGSC0003DMG400001658	PGSC0003DMP400002984
PGSC0003DMT400004178	PGSC0003DMG400001659	PGSC0003DMP400002986
PGSC0003DMT400004179	PGSC0003DMG400001660	PGSC0003DMP400002987
PGSC0003DMT400004180	PGSC0003DMG400001661	PGSC0003DMP400002988
PGSC0003DMT400004181	PGSC0003DMG400001662	PGSC0003DMP400002989
PGSC0003DMT400004186	PGSC0003DMG400001667	PGSC0003DMP400002990
PGSC0003DMT400004187	PGSC0003DMG400001668	PGSC0003DMP400002991
PGSC0003DMT400004190	PGSC0003DMG400001670	PGSC0003DMP400002993
PGSC0003DMT400004191	PGSC0003DMG400001671	PGSC0003DMP400002994
PGSC0003DMT400004193	PGSC0003DMG400001672	PGSC0003DMP400002996
PGSC0003DMT400004200	PGSC0003DMG400001674	PGSC0003DMP400003002
PGSC0003DMT400004212	PGSC0003DMG400001676	PGSC0003DMP400003008
PGSC0003DMT400004214	PGSC0003DMG400001677	PGSC0003DMP400003010
PGSC0003DMT400004217	PGSC0003DMG400001679	PGSC0003DMP400003013
PGSC0003DMT400004221	PGSC0003DMG400001680	PGSC0003DMP400003016
PGSC0003DMT400004222	PGSC0003DMG400001681	PGSC0003DMP400003017
PGSC0003DMT400004228	PGSC0003DMG400001682	PGSC0003DMP400003019
PGSC0003DMT400004230	PGSC0003DMG400001683	PGSC0003DMP400003020
PGSC0003DMT400004234	PGSC0003DMG400001684	PGSC0003DMP400003023
PGSC0003DMT400004235	PGSC0003DMG400001685	PGSC0003DMP400003024
PGSC0003DMT400004237	PGSC0003DMG402001686	PGSC0003DMP400003026
PGSC0003DMT400004238	PGSC0003DMG401001686	PGSC0003DMP400003027
PGSC0003DMT400004240	PGSC0003DMG400001687	PGSC0003DMP400003029
PGSC0003DMT400004241	PGSC0003DMG400001688	PGSC0003DMP400003030
PGSC0003DMT400004245	PGSC0003DMG400001690	PGSC0003DMP400003033
PGSC0003DMT400004251	PGSC0003DMG400001692	PGSC0003DMP400003039
PGSC0003DMT400004254	PGSC0003DMG401001693	PGSC0003DMP400003042
PGSC0003DMT400004258	PGSC0003DMG400001694	PGSC0003DMP400003046
PGSC0003DMT400004269	PGSC0003DMG400001696	PGSC0003DMP400003048
PGSC0003DMT400004275	PGSC0003DMG400001698	PGSC0003DMP400003050
PGSC0003DMT400004281	PGSC0003DMG400001700	PGSC0003DMP400003053
PGSC0003DMT400004282	PGSC0003DMG401001701	PGSC0003DMP400003054
PGSC0003DMT400004298	PGSC0003DMG400001703	PGSC0003DMP400003064
PGSC0003DMT400004306	PGSC0003DMG400001706	PGSC0003DMP400003068
PGSC0003DMT400004307	PGSC0003DMG400001707	PGSC0003DMP400003069
PGSC0003DMT400004308	PGSC0003DMG400001708	PGSC0003DMP400003070
PGSC0003DMT400004310	PGSC0003DMG400001709	PGSC0003DMP400003072
PGSC0003DMT400004312	PGSC0003DMG402001710	PGSC0003DMP400003074
PGSC0003DMT400004314	PGSC0003DMG400001711	PGSC0003DMP400003075
PGSC0003DMT400004317	PGSC0003DMG400001713	PGSC0003DMP400003078
PGSC0003DMT400004319	PGSC0003DMG400001714	PGSC0003DMP400003080
PGSC0003DMT400004320	PGSC0003DMG400001715	PGSC0003DMP400003081
PGSC0003DMT400004322	PGSC0003DMG400001716	PGSC0003DMP400003083
PGSC0003DMT400004323	PGSC0003DMG400001717	PGSC0003DMP400003084
PGSC0003DMT400004324	PGSC0003DMG400001718	PGSC0003DMP400003085
PGSC0003DMT400004325	PGSC0003DMG400001719	PGSC0003DMP400003086
PGSC0003DMT400004330	PGSC0003DMG401001720	PGSC0003DMP400003089
PGSC0003DMT400004336	PGSC0003DMG402001720	PGSC0003DMP400003093
PGSC0003DMT400004338	PGSC0003DMG400001721	PGSC0003DMP400003094
PGSC0003DMT400004341	PGSC0003DMG400001722	PGSC0003DMP400003096
PGSC0003DMT400004344	PGSC0003DMG400001723	PGSC0003DMP400003097
PGSC0003DMT400004346	PGSC0003DMG401001724	PGSC0003DMP400003099
PGSC0003DMT400004353	PGSC0003DMG403001724	PGSC0003DMP400003102
PGSC0003DMT400004355	PGSC0003DMG400001726	PGSC0003DMP400003104
PGSC0003DMT400004357	PGSC0003DMG400001728	PGSC0003DMP400003105
PGSC0003DMT400004360	PGSC0003DMG401001731	PGSC0003DMP400003107
PGSC0003DMT400004361	PGSC0003DMG402001731	PGSC0003DMP400003108
PGSC0003DMT400004363	PGSC0003DMG400001732	PGSC0003DMP400003110
PGSC0003DMT400004365	PGSC0003DMG400001733	PGSC0003DMP400003112
PGSC0003DMT400004369	PGSC0003DMG400001735	PGSC0003DMP400003116
PGSC0003DMT400004371	PGSC0003DMG400001737	PGSC0003DMP400003118
PGSC0003DMT400004383	PGSC0003DMG400001743	PGSC0003DMP400003124
PGSC0003DMT400004384	PGSC0003DMG400001744	PGSC0003DMP400003125
PGSC0003DMT400004386	PGSC0003DMG400001746	PGSC0003DMP400003127
PGSC0003DMT400004390	PGSC0003DMG400001747	PGSC0003DMP400003130
PGSC0003DMT400004391	PGSC0003DMG400001748	PGSC0003DMP400003131
PGSC0003DMT400004392	PGSC0003DMG400001749	PGSC0003DMP400003132
PGSC0003DMT400004399	PGSC0003DMG400001752	PGSC0003DMP400003137
PGSC0003DMT400004400	PGSC0003DMG400001753	PGSC0003DMP400003138
PGSC0003DMT400004401	PGSC0003DMG400001754	PGSC0003DMP400003139
PGSC0003DMT400004403	PGSC0003DMG400001755	PGSC0003DMP400003141
PGSC0003DMT400004414	PGSC0003DMG400001759	PGSC0003DMP400003147
PGSC0003DMT400004415	PGSC0003DMG400001760	PGSC0003DMP400003148
PGSC0003DMT400004430	PGSC0003DMG400001766	PGSC0003DMP400003156
PGSC0003DMT400004431	PGSC0003DMG400001767	PGSC0003DMP400003157
PGSC0003DMT400004433	PGSC0003DMG400001768	PGSC0003DMP400003159
PGSC0003DMT400004435	PGSC0003DMG400001769	PGSC0003DMP400003161
PGSC0003DMT400004436	PGSC0003DMG400001770	PGSC0003DMP400003162
PGSC0003DMT400004441	PGSC0003DMG400001772	PGSC0003DMP400003167
PGSC0003DMT400004442	PGSC0003DMG400001773	PGSC0003DMP400003168
PGSC0003DMT400004447	PGSC0003DMG400001774	PGSC0003DMP400003170
PGSC0003DMT400004449	PGSC0003DMG400001775	PGSC0003DMP400003172
PGSC0003DMT400004459	PGSC0003DMG400001776	PGSC0003DMP400003182
PGSC0003DMT400004461	PGSC0003DMG400001777	PGSC0003DMP400003184
PGSC0003DMT400004463	PGSC0003DMG400001779	PGSC0003DMP400003185
PGSC0003DMT400004465	PGSC0003DMG400001780	PGSC0003DMP400003187
PGSC0003DMT400004466	PGSC0003DMG400001781	PGSC0003DMP400003188
PGSC0003DMT400004475	PGSC0003DMG401001782	PGSC0003DMP400003190
PGSC0003DMT400004477	PGSC0003DMG402001782	PGSC0003DMP400003191
PGSC0003DMT400004479	PGSC0003DMG400001783	PGSC0003DMP400003193
PGSC0003DMT400004486	PGSC0003DMG400001786	PGSC0003DMP400003196
PGSC0003DMT400004487	PGSC0003DMG400001787	PGSC0003DMP400003197
PGSC0003DMT400004488	PGSC0003DMG400001788	PGSC0003DMP400003198
PGSC0003DMT400004493	PGSC0003DMG400001789	PGSC0003DMP400003200
PGSC0003DMT400004512	PGSC0003DMG400001794	PGSC0003DMP400003210
PGSC0003DMT400004514	PGSC0003DMG400001795	PGSC0003DMP400003211
PGSC0003DMT400004515	PGSC0003DMG400001796	PGSC0003DMP400003212
PGSC0003DMT400004521	PGSC0003DMG400001797	PGSC0003DMP400003215
PGSC0003DMT400004523	PGSC0003DMG400001798	PGSC0003DMP400003217
PGSC0003DMT400004531	PGSC0003DMG400001801	PGSC0003DMP400003221
PGSC0003DMT400004532	PGSC0003DMG400001802	PGSC0003DMP400003222
PGSC0003DMT400004534	PGSC0003DMG400001803	PGSC0003DMP400003224
PGSC0003DMT400004540	PGSC0003DMG400001804	PGSC0003DMP400003229
PGSC0003DMT400004544	PGSC0003DMG400001805	PGSC0003DMP400003232
PGSC0003DMT400004549	PGSC0003DMG400001807	PGSC0003DMP400003236
PGSC0003DMT400004550	PGSC0003DMG400001808	PGSC0003DMP400003237
PGSC0003DMT400004553	PGSC0003DMG400001809	PGSC0003DMP400003240
PGSC0003DMT400004562	PGSC0003DMG400001811	PGSC0003DMP400003248
PGSC0003DMT400004563	PGSC0003DMG400001812	PGSC0003DMP400003249
PGSC0003DMT400004589	PGSC0003DMG400001819	PGSC0003DMP400003262
PGSC0003DMT400004592	PGSC0003DMG400001820	PGSC0003DMP400003265
PGSC0003DMT400004594	PGSC0003DMG400001821	PGSC0003DMP400003267
PGSC0003DMT400004595	PGSC0003DMG400001822	PGSC0003DMP400003268
PGSC0003DMT400004597	PGSC0003DMG400001823	PGSC0003DMP400003270
PGSC0003DMT400004617	PGSC0003DMG400001830	PGSC0003DMP400003279
PGSC0003DMT400004618	PGSC0003DMG400001831	PGSC0003DMP400003280
PGSC0003DMT400004624	PGSC0003DMG400001833	PGSC0003DMP400003284
PGSC0003DMT400004627	PGSC0003DMG400001834	PGSC0003DMP400003287
PGSC0003DMT400004633	PGSC0003DMG400001836	PGSC0003DMP400003290
PGSC0003DMT400004637	PGSC0003DMG400001838	PGSC0003DMP400003293
PGSC0003DMT400004641	PGSC0003DMG400001840	PGSC0003DMP400003296
PGSC0003DMT400004642	PGSC0003DMG400001841	PGSC0003DMP400003297
PGSC0003DMT400004645	PGSC0003DMG400001842	PGSC0003DMP400003299
PGSC0003DMT400004650	PGSC0003DMG400001844	PGSC0003DMP400003302
PGSC0003DMT400004651	PGSC0003DMG400001845	PGSC0003DMP400003303
PGSC0003DMT400004654	PGSC0003DMG400001846	PGSC0003DMP400003305
PGSC0003DMT400004655	PGSC0003DMG400001847	PGSC0003DMP400003306
PGSC0003DMT400004660	PGSC0003DMG400001848	PGSC0003DMP400003309
PGSC0003DMT400004661	PGSC0003DMG400001849	PGSC0003DMP400003310
PGSC0003DMT400004663	PGSC0003DMG400001850	PGSC0003DMP400003312
PGSC0003DMT400004680	PGSC0003DMG400001853	PGSC0003DMP400003316
PGSC0003DMT400004684	PGSC0003DMG400001854	PGSC0003DMP400003320
PGSC0003DMT400004686	PGSC0003DMG400001855	PGSC0003DMP400003321
PGSC0003DMT400004688	PGSC0003DMG400001856	PGSC0003DMP400003323
PGSC0003DMT400004695	PGSC0003DMG400001858	PGSC0003DMP400003328
PGSC0003DMT400004709	PGSC0003DMG400001862	PGSC0003DMP400003334
PGSC0003DMT400004712	PGSC0003DMG400001863	PGSC0003DMP400003337
PGSC0003DMT400004714	PGSC0003DMG400001864	PGSC0003DMP400003339
PGSC0003DMT400004717	PGSC0003DMG400001865	PGSC0003DMP400003342
PGSC0003DMT400004720	PGSC0003DMG400001866	PGSC0003DMP400003345
PGSC0003DMT400004734	PGSC0003DMG400001876	PGSC0003DMP400003352
PGSC0003DMT400004741	PGSC0003DMG400001879	PGSC0003DMP400003357
PGSC0003DMT400004748	PGSC0003DMG400001882	PGSC0003DMP400003361
PGSC0003DMT400004751	PGSC0003DMG400001883	PGSC0003DMP400003363
PGSC0003DMT400004753	PGSC0003DMG400001884	PGSC0003DMP400003364
PGSC0003DMT400004763	PGSC0003DMG400001886	PGSC0003DMP400003370
PGSC0003DMT400004767	PGSC0003DMG400001887	PGSC0003DMP400003374
PGSC0003DMT400004768	PGSC0003DMG400001888	PGSC0003DMP400003375
PGSC0003DMT400004769	PGSC0003DMG400001889	PGSC0003DMP400003376
PGSC0003DMT400004770	PGSC0003DMG400001890	PGSC0003DMP400003377
PGSC0003DMT400004772	PGSC0003DMG400001891	PGSC0003DMP400003379
PGSC0003DMT400004773	PGSC0003DMG400001892	PGSC0003DMP400003380
PGSC0003DMT400004778	PGSC0003DMG400001895	PGSC0003DMP400003384
PGSC0003DMT400004781	PGSC0003DMG400001896	PGSC0003DMP400003387
PGSC0003DMT400004782	PGSC0003DMG400001897	PGSC0003DMP400003388
PGSC0003DMT400004783	PGSC0003DMG400001898	PGSC0003DMP400003389
PGSC0003DMT400004785	PGSC0003DMG400001900	PGSC0003DMP400003390
PGSC0003DMT400004786	PGSC0003DMG400001901	PGSC0003DMP400003391
PGSC0003DMT400004789	PGSC0003DMG402001903	PGSC0003DMP400003394
PGSC0003DMT400004790	PGSC0003DMG401001903	PGSC0003DMP400003395
PGSC0003DMT400004791	PGSC0003DMG400001904	PGSC0003DMP400003396
PGSC0003DMT400004792	PGSC0003DMG400001905	PGSC0003DMP400003397
PGSC0003DMT400004796	PGSC0003DMG400001907	PGSC0003DMP400003399
PGSC0003DMT400004806	PGSC0003DMG400001912	PGSC0003DMP400003405
PGSC0003DMT400004809	PGSC0003DMG400001913	PGSC0003DMP400003408
PGSC0003DMT400004810	PGSC0003DMG400001914	PGSC0003DMP400003409
PGSC0003DMT400004821	PGSC0003DMG400001916	PGSC0003DMP400003412
PGSC0003DMT400004826	PGSC0003DMG400001917	PGSC0003DMP400003417
PGSC0003DMT400004830	PGSC0003DMG400001918	PGSC0003DMP400003421
PGSC0003DMT400004832	PGSC0003DMG400001919	PGSC0003DMP400003422
PGSC0003DMT400004836	PGSC0003DMG400001920	PGSC0003DMP400003425
PGSC0003DMT400004838	PGSC0003DMG400001921	PGSC0003DMP400003426
PGSC0003DMT400004842	PGSC0003DMG400001922	PGSC0003DMP400003430
PGSC0003DMT400004843	PGSC0003DMG400001923	PGSC0003DMP400003431
PGSC0003DMT400004845	PGSC0003DMG400001924	PGSC0003DMP400003433
PGSC0003DMT400004846	PGSC0003DMG400001925	PGSC0003DMP400003434
PGSC0003DMT400004849	PGSC0003DMG401001926	PGSC0003DMP400003436
PGSC0003DMT400004850	PGSC0003DMG402001926	PGSC0003DMP400003437
PGSC0003DMT400004851	PGSC0003DMG400001927	PGSC0003DMP400003438
PGSC0003DMT400004852	PGSC0003DMG400001928	PGSC0003DMP400003439
PGSC0003DMT400004853	PGSC0003DMG400001929	PGSC0003DMP400003440
PGSC0003DMT400004855	PGSC0003DMG400001930	PGSC0003DMP400003442
PGSC0003DMT400004856	PGSC0003DMG400001931	PGSC0003DMP400003443
PGSC0003DMT400004861	PGSC0003DMG400001932	PGSC0003DMP400003446
PGSC0003DMT400004867	PGSC0003DMG400001934	PGSC0003DMP400003450
PGSC0003DMT400004869	PGSC0003DMG400001935	PGSC0003DMP400003452
PGSC0003DMT400004871	PGSC0003DMG400001936	PGSC0003DMP400003454
PGSC0003DMT400004873	PGSC0003DMG400001937	PGSC0003DMP400003456
PGSC0003DMT400004878	PGSC0003DMG400001939	PGSC0003DMP400003459
PGSC0003DMT400004879	PGSC0003DMG400001940	PGSC0003DMP400003460
PGSC0003DMT400004881	PGSC0003DMG401001941	PGSC0003DMP400003462
PGSC0003DMT400004882	PGSC0003DMG402001941	PGSC0003DMP400003463
PGSC0003DMT400004888	PGSC0003DMG400001942	PGSC0003DMP400003465
PGSC0003DMT400004890	PGSC0003DMG400001943	PGSC0003DMP400003466
PGSC0003DMT400004894	PGSC0003DMG400001945	PGSC0003DMP400003469
PGSC0003DMT400004910	PGSC0003DMG400001948	PGSC0003DMP400003484
PGSC0003DMT400004914	PGSC0003DMG400001950	PGSC0003DMP400003487
PGSC0003DMT400004927	PGSC0003DMG400001952	PGSC0003DMP400003499
PGSC0003DMT400004931	PGSC0003DMG400001953	PGSC0003DMP400003502
PGSC0003DMT400004938	PGSC0003DMG400001956	PGSC0003DMP400003509
PGSC0003DMT400004947	PGSC0003DMG400001958	PGSC0003DMP400003516
PGSC0003DMT400004951	PGSC0003DMG400001960	PGSC0003DMP400003519
PGSC0003DMT400004961	PGSC0003DMG400001961	PGSC0003DMP400003522
PGSC0003DMT400004962	PGSC0003DMG400001962	PGSC0003DMP400003523
PGSC0003DMT400004963	PGSC0003DMG400001963	PGSC0003DMP400003524
PGSC0003DMT400004968	PGSC0003DMG400001965	PGSC0003DMP400003527
PGSC0003DMT400004973	PGSC0003DMG400001967	PGSC0003DMP400003531
PGSC0003DMT400004975	PGSC0003DMG402001968	PGSC0003DMP400003533
PGSC0003DMT400004978	PGSC0003DMG401001968	PGSC0003DMP400003536
PGSC0003DMT400004981	PGSC0003DMG400001969	PGSC0003DMP400003539
PGSC0003DMT400004986	PGSC0003DMG400001970	PGSC0003DMP400003543
PGSC0003DMT400004988	PGSC0003DMG400001971	PGSC0003DMP400003545
PGSC0003DMT400004995	PGSC0003DMG400001976	PGSC0003DMP400003549
PGSC0003DMT400004999	PGSC0003DMG400001977	PGSC0003DMP400003552
PGSC0003DMT400005001	PGSC0003DMG401001978	PGSC0003DMP400003553
PGSC0003DMT400005002	PGSC0003DMG402001978	PGSC0003DMP400003554
PGSC0003DMT400005010	PGSC0003DMG400001980	PGSC0003DMP400003558
PGSC0003DMT400005012	PGSC0003DMG400001982	PGSC0003DMP400003560
PGSC0003DMT400005013	PGSC0003DMG400001983	PGSC0003DMP400003561
PGSC0003DMT400005017	PGSC0003DMG401001984	PGSC0003DMP400003562
PGSC0003DMT400005018	PGSC0003DMG402001984	PGSC0003DMP400003563
PGSC0003DMT400005019	PGSC0003DMG400001985	PGSC0003DMP400003564
PGSC0003DMT400005021	PGSC0003DMG400001986	PGSC0003DMP400003566
PGSC0003DMT400005027	PGSC0003DMG400001988	PGSC0003DMP400003571
PGSC0003DMT400005040	PGSC0003DMG400001992	PGSC0003DMP400003578
PGSC0003DMT400005061	PGSC0003DMG400001998	PGSC0003DMP400003588
PGSC0003DMT400005064	PGSC0003DMG400001999	PGSC0003DMP400003591
PGSC0003DMT400005066	PGSC0003DMG400002000	PGSC0003DMP400003593
PGSC0003DMT400005067	PGSC0003DMG400002001	PGSC0003DMP400003594
PGSC0003DMT400005071	PGSC0003DMG400002003	PGSC0003DMP400003595
PGSC0003DMT400005073	PGSC0003DMG400002005	PGSC0003DMP400003596
PGSC0003DMT400005075	PGSC0003DMG400002007	PGSC0003DMP400003597
PGSC0003DMT400005078	PGSC0003DMG400002009	PGSC0003DMP400003600
PGSC0003DMT400005082	PGSC0003DMG400002011	PGSC0003DMP400003603
PGSC0003DMT400005084	PGSC0003DMG400002012	PGSC0003DMP400003605
PGSC0003DMT400005085	PGSC0003DMG400002013	PGSC0003DMP400003606
PGSC0003DMT400005086	PGSC0003DMG400002014	PGSC0003DMP400003607
PGSC0003DMT400005088	PGSC0003DMG400002015	PGSC0003DMP400003609
PGSC0003DMT400005104	PGSC0003DMG400002018	PGSC0003DMP400003613
PGSC0003DMT400005106	PGSC0003DMG400002019	PGSC0003DMP400003615
PGSC0003DMT400005111	PGSC0003DMG400002021	PGSC0003DMP400003620
PGSC0003DMT400005115	PGSC0003DMG400002022	PGSC0003DMP400003624
PGSC0003DMT400005125	PGSC0003DMG401002024	PGSC0003DMP400003628
PGSC0003DMT400005127	PGSC0003DMG402002024	PGSC0003DMP400003629
PGSC0003DMT400005133	PGSC0003DMG400002026	PGSC0003DMP400003633
PGSC0003DMT400005134	PGSC0003DMG400002027	PGSC0003DMP400003634
PGSC0003DMT400005135	PGSC0003DMG400002028	PGSC0003DMP400003635
PGSC0003DMT400005136	PGSC0003DMG400002029	PGSC0003DMP400003636
PGSC0003DMT400005150	PGSC0003DMG400002035	PGSC0003DMP400003646
PGSC0003DMT400005151	PGSC0003DMG400002036	PGSC0003DMP400003647
PGSC0003DMT400005156	PGSC0003DMG400002038	PGSC0003DMP400003650
PGSC0003DMT400005159	PGSC0003DMG400002039	PGSC0003DMP400003652
PGSC0003DMT400005162	PGSC0003DMG400002040	PGSC0003DMP400003653
PGSC0003DMT400005175	PGSC0003DMG400002044	PGSC0003DMP400003656
PGSC0003DMT400005177	PGSC0003DMG400002045	PGSC0003DMP400003658
PGSC0003DMT400005181	PGSC0003DMG400002046	PGSC0003DMP400003660
PGSC0003DMT400005182	PGSC0003DMG400002047	PGSC0003DMP400003661
PGSC0003DMT400005183	PGSC0003DMG400002048	PGSC0003DMP400003662
PGSC0003DMT400005186	PGSC0003DMG400002049	PGSC0003DMP400003665
PGSC0003DMT400005187	PGSC0003DMG400002050	PGSC0003DMP400003666
PGSC0003DMT400005199	PGSC0003DMG400002052	PGSC0003DMP400003668
PGSC0003DMT400005205	PGSC0003DMG401002053	PGSC0003DMP400003672
PGSC0003DMT400005206	PGSC0003DMG402002053	PGSC0003DMP400003673
PGSC0003DMT400005207	PGSC0003DMG400002054	PGSC0003DMP400003674
PGSC0003DMT400005233	PGSC0003DMG402002060	PGSC0003DMP400003682
PGSC0003DMT400005236	PGSC0003DMG400002061	PGSC0003DMP400003684
PGSC0003DMT400005245	PGSC0003DMG400002066	PGSC0003DMP400003691
PGSC0003DMT400005246	PGSC0003DMG400002067	PGSC0003DMP400003692
PGSC0003DMT400005250	PGSC0003DMG400002068	PGSC0003DMP400003695
PGSC0003DMT400005252	PGSC0003DMG400002069	PGSC0003DMP400003696
PGSC0003DMT400005259	PGSC0003DMG400002070	PGSC0003DMP400003698
PGSC0003DMT400005265	PGSC0003DMG400002073	PGSC0003DMP400003704
PGSC0003DMT400005268	PGSC0003DMG400002074	PGSC0003DMP400003706
PGSC0003DMT400005277	PGSC0003DMG400002076	PGSC0003DMP400003710
PGSC0003DMT400005298	PGSC0003DMG400002078	PGSC0003DMP400003721
PGSC0003DMT400005303	PGSC0003DMG400002079	PGSC0003DMP400003723
PGSC0003DMT400005339	PGSC0003DMG400002083	PGSC0003DMP400003739
PGSC0003DMT400005342	PGSC0003DMG400002084	PGSC0003DMP400003742
PGSC0003DMT400005343	PGSC0003DMG400002085	PGSC0003DMP400003743
PGSC0003DMT400005344	PGSC0003DMG400002086	PGSC0003DMP400003744
PGSC0003DMT400005348	PGSC0003DMG400002087	PGSC0003DMP400003747
PGSC0003DMT400005355	PGSC0003DMG400002091	PGSC0003DMP400003752
PGSC0003DMT400005360	PGSC0003DMG400002093	PGSC0003DMP400003754
PGSC0003DMT400005365	PGSC0003DMG401002094	PGSC0003DMP400003758
PGSC0003DMT400005369	PGSC0003DMG402002094	PGSC0003DMP400003761
PGSC0003DMT400005376	PGSC0003DMG400002098	PGSC0003DMP400003766
PGSC0003DMT400005377	PGSC0003DMG400002099	PGSC0003DMP400003767
PGSC0003DMT400005378	PGSC0003DMG400002100	PGSC0003DMP400003768
PGSC0003DMT400005379	PGSC0003DMG400002101	PGSC0003DMP400003769
PGSC0003DMT400005383	PGSC0003DMG400002103	PGSC0003DMP400003772
PGSC0003DMT400005384	PGSC0003DMG400002104	PGSC0003DMP400003773
PGSC0003DMT400005394	PGSC0003DMG401002106	PGSC0003DMP400003776
PGSC0003DMT400005395	PGSC0003DMG402002106	PGSC0003DMP400003777
PGSC0003DMT400005396	PGSC0003DMG400002107	PGSC0003DMP400003778
PGSC0003DMT400005398	PGSC0003DMG400002108	PGSC0003DMP400003780
PGSC0003DMT400005404	PGSC0003DMG400002110	PGSC0003DMP400003783
PGSC0003DMT400005419	PGSC0003DMG400002118	PGSC0003DMP400003791
PGSC0003DMT400005421	PGSC0003DMG401002119	PGSC0003DMP400003793
PGSC0003DMT400005422	PGSC0003DMG402002119	PGSC0003DMP400003794
PGSC0003DMT400005425	PGSC0003DMG400002120	PGSC0003DMP400003795
PGSC0003DMT400005429	PGSC0003DMG401002121	PGSC0003DMP400003798
PGSC0003DMT400005432	PGSC0003DMG401002122	PGSC0003DMP400003801
PGSC0003DMT400005435	PGSC0003DMG402002122	PGSC0003DMP400003802
PGSC0003DMT400005437	PGSC0003DMG400002123	PGSC0003DMP400003803
PGSC0003DMT400005441	PGSC0003DMG400002124	PGSC0003DMP400003805
PGSC0003DMT400005446	PGSC0003DMG400002125	PGSC0003DMP400003807
PGSC0003DMT400005463	PGSC0003DMG401002131	PGSC0003DMP400003815
PGSC0003DMT400005466	PGSC0003DMG402002131	PGSC0003DMP400003818
PGSC0003DMT400005470	PGSC0003DMG400002133	PGSC0003DMP400003820
PGSC0003DMT400005471	PGSC0003DMG400002134	PGSC0003DMP400003821
PGSC0003DMT400005472	PGSC0003DMG400002135	PGSC0003DMP400003822
PGSC0003DMT400005476	PGSC0003DMG400002138	PGSC0003DMP400003825
PGSC0003DMT400005481	PGSC0003DMG400002139	PGSC0003DMP400003830
PGSC0003DMT400005484	PGSC0003DMG400002141	PGSC0003DMP400003832
PGSC0003DMT400005489	PGSC0003DMG400002143	PGSC0003DMP400003835
PGSC0003DMT400005490	PGSC0003DMG400002144	PGSC0003DMP400003836
PGSC0003DMT400005492	PGSC0003DMG400002146	PGSC0003DMP400003838
PGSC0003DMT400005501	PGSC0003DMG400002149	PGSC0003DMP400003846
PGSC0003DMT400005506	PGSC0003DMG400002151	PGSC0003DMP400003849
PGSC0003DMT400005510	PGSC0003DMG400002152	PGSC0003DMP400003852
PGSC0003DMT400005512	PGSC0003DMG400002153	PGSC0003DMP400003853
PGSC0003DMT400005519	PGSC0003DMG400002156	PGSC0003DMP400003857
PGSC0003DMT400005530	PGSC0003DMG400002161	PGSC0003DMP400003864
PGSC0003DMT400005532	PGSC0003DMG400002163	PGSC0003DMP400003865
PGSC0003DMT400005534	PGSC0003DMG401002164	PGSC0003DMP400003866
PGSC0003DMT400005536	PGSC0003DMG402002164	PGSC0003DMP400003867
PGSC0003DMT400005538	PGSC0003DMG400002165	PGSC0003DMP400003869
PGSC0003DMT400005542	PGSC0003DMG400002166	PGSC0003DMP400003870
PGSC0003DMT400005544	PGSC0003DMG400002167	PGSC0003DMP400003872
PGSC0003DMT400005546	PGSC0003DMG400002168	PGSC0003DMP400003874
PGSC0003DMT400005547	PGSC0003DMG400002169	PGSC0003DMP400003875
PGSC0003DMT400005549	PGSC0003DMG400002170	PGSC0003DMP400003876
PGSC0003DMT400005551	PGSC0003DMG400002171	PGSC0003DMP400003877
PGSC0003DMT400005552	PGSC0003DMG400002172	PGSC0003DMP400003878
PGSC0003DMT400005554	PGSC0003DMG400002173	PGSC0003DMP400003880
PGSC0003DMT400005557	PGSC0003DMG400002174	PGSC0003DMP400003883
PGSC0003DMT400005558	PGSC0003DMG400002175	PGSC0003DMP400003884
PGSC0003DMT400005560	PGSC0003DMG400002176	PGSC0003DMP400003886
PGSC0003DMT400005561	PGSC0003DMG401002177	PGSC0003DMP400003887
PGSC0003DMT400005563	PGSC0003DMG402002177	PGSC0003DMP400003888
PGSC0003DMT400005571	PGSC0003DMG400002179	PGSC0003DMP400003894
PGSC0003DMT400005572	PGSC0003DMG400002180	PGSC0003DMP400003895
PGSC0003DMT400005573	PGSC0003DMG400002181	PGSC0003DMP400003896
PGSC0003DMT400005578	PGSC0003DMG400002183	PGSC0003DMP400003898
PGSC0003DMT400005582	PGSC0003DMG400002184	PGSC0003DMP400003901
PGSC0003DMT400005587	PGSC0003DMG400002186	PGSC0003DMP400003905
PGSC0003DMT400005592	PGSC0003DMG400002189	PGSC0003DMP400003908
PGSC0003DMT400005594	PGSC0003DMG400002190	PGSC0003DMP400003910
PGSC0003DMT400005606	PGSC0003DMG400002196	PGSC0003DMP400003920
PGSC0003DMT400005609	PGSC0003DMG400002199	PGSC0003DMP400003923
PGSC0003DMT400005611	PGSC0003DMG400002200	PGSC0003DMP400003925
PGSC0003DMT400005613	PGSC0003DMG400002201	PGSC0003DMP400003927
PGSC0003DMT400005614	PGSC0003DMG400002202	PGSC0003DMP400003928
PGSC0003DMT400005623	PGSC0003DMG400002204	PGSC0003DMP400003933
PGSC0003DMT400005625	PGSC0003DMG400002205	PGSC0003DMP400003935
PGSC0003DMT400005637	PGSC0003DMG400002208	PGSC0003DMP400003938
PGSC0003DMT400005639	PGSC0003DMG400002209	PGSC0003DMP400003939
PGSC0003DMT400005640	PGSC0003DMG400002210	PGSC0003DMP400003940
PGSC0003DMT400005644	PGSC0003DMG400002212	PGSC0003DMP400003943
PGSC0003DMT400005645	PGSC0003DMG400002213	PGSC0003DMP400003944
PGSC0003DMT400005663	PGSC0003DMG400002217	PGSC0003DMP400003952
PGSC0003DMT400005672	PGSC0003DMG400002221	PGSC0003DMP400003956
PGSC0003DMT400005675	PGSC0003DMG400002223	PGSC0003DMP400003958
PGSC0003DMT400005677	PGSC0003DMG400002225	PGSC0003DMP400003959
PGSC0003DMT400005679	PGSC0003DMG400002226	PGSC0003DMP400003961
PGSC0003DMT400005680	PGSC0003DMG400002227	PGSC0003DMP400003962
PGSC0003DMT400005682	PGSC0003DMG400002228	PGSC0003DMP400003964
PGSC0003DMT400005684	PGSC0003DMG401002229	PGSC0003DMP400003966
PGSC0003DMT400005689	PGSC0003DMG402002229	PGSC0003DMP400003970
PGSC0003DMT400005698	PGSC0003DMG400002231	PGSC0003DMP400003978
PGSC0003DMT400005705	PGSC0003DMG400002233	PGSC0003DMP400003984
PGSC0003DMT400005709	PGSC0003DMG400002235	PGSC0003DMP400003986
PGSC0003DMT400005712	PGSC0003DMG400002236	PGSC0003DMP400003989
PGSC0003DMT400005718	PGSC0003DMG400002237	PGSC0003DMP400003995
PGSC0003DMT400005722	PGSC0003DMG400002238	PGSC0003DMP400003997
PGSC0003DMT400005726	PGSC0003DMG401002240	PGSC0003DMP400003999
PGSC0003DMT400005728	PGSC0003DMG402002240	PGSC0003DMP400004001
PGSC0003DMT400005733	PGSC0003DMG402002242	PGSC0003DMP400004004
PGSC0003DMT400005752	PGSC0003DMG400002248	PGSC0003DMP400004018
PGSC0003DMT400005756	PGSC0003DMG400002249	PGSC0003DMP400004021
PGSC0003DMT400005759	PGSC0003DMG400002250	PGSC0003DMP400004024
PGSC0003DMT400005760	PGSC0003DMG400002251	PGSC0003DMP400004025
PGSC0003DMT400005766	PGSC0003DMG400002253	PGSC0003DMP400004028
PGSC0003DMT400005782	PGSC0003DMG400002261	PGSC0003DMP400004037
PGSC0003DMT400005783	PGSC0003DMG401002262	PGSC0003DMP400004038
PGSC0003DMT400005785	PGSC0003DMG402002262	PGSC0003DMP400004040
PGSC0003DMT400005798	PGSC0003DMG400002267	PGSC0003DMP400004044
PGSC0003DMT400005800	PGSC0003DMG400002268	PGSC0003DMP400004046
PGSC0003DMT400005803	PGSC0003DMG401002270	PGSC0003DMP400004047
PGSC0003DMT400005804	PGSC0003DMG402002270	PGSC0003DMP400004048
PGSC0003DMT400005815	PGSC0003DMG403002270	PGSC0003DMP400004049
PGSC0003DMT400005836	PGSC0003DMG400002272	PGSC0003DMP400004053
PGSC0003DMT400005837	PGSC0003DMG400002273	PGSC0003DMP400004054
PGSC0003DMT400005838	PGSC0003DMG400002274	PGSC0003DMP400004055
PGSC0003DMT400005860	PGSC0003DMG400002279	PGSC0003DMP400004061
PGSC0003DMT400005867	PGSC0003DMG401002283	PGSC0003DMP400004065
PGSC0003DMT400005868	PGSC0003DMG402002283	PGSC0003DMP400004066
PGSC0003DMT400005872	PGSC0003DMG400002285	PGSC0003DMP400004070
PGSC0003DMT400005873	PGSC0003DMG400002286	PGSC0003DMP400004071
PGSC0003DMT400005877	PGSC0003DMG400002287	PGSC0003DMP400004075
PGSC0003DMT400005882	PGSC0003DMG400002288	PGSC0003DMP400004077
PGSC0003DMT400005889	PGSC0003DMG400002290	PGSC0003DMP400004079
PGSC0003DMT400005893	PGSC0003DMG400002291	PGSC0003DMP400004081
PGSC0003DMT400005896	PGSC0003DMG400002292	PGSC0003DMP400004084
PGSC0003DMT400005897	PGSC0003DMG400002293	PGSC0003DMP400004085
PGSC0003DMT400005911	PGSC0003DMG400002298	PGSC0003DMP400004097
PGSC0003DMT400005915	PGSC0003DMG400002300	PGSC0003DMP400004098
PGSC0003DMT400005927	PGSC0003DMG400002301	PGSC0003DMP400004109
PGSC0003DMT400005932	PGSC0003DMG400002302	PGSC0003DMP400004112
PGSC0003DMT400005933	PGSC0003DMG400002303	PGSC0003DMP400004113
PGSC0003DMT400005935	PGSC0003DMG400002304	PGSC0003DMP400004114
PGSC0003DMT400005949	PGSC0003DMG400002309	PGSC0003DMP400004123
PGSC0003DMT400005951	PGSC0003DMG400002310	PGSC0003DMP400004125
PGSC0003DMT400005956	PGSC0003DMG400002312	PGSC0003DMP400004129
PGSC0003DMT400005959	PGSC0003DMG400002313	PGSC0003DMP400004132
PGSC0003DMT400005961	PGSC0003DMG400002315	PGSC0003DMP400004134
PGSC0003DMT400005965	PGSC0003DMG400002318	PGSC0003DMP400004136
PGSC0003DMT400005967	PGSC0003DMG400002319	PGSC0003DMP400004137
PGSC0003DMT400005971	PGSC0003DMG400002321	PGSC0003DMP400004140
PGSC0003DMT400005974	PGSC0003DMG400002323	PGSC0003DMP400004143
PGSC0003DMT400005977	PGSC0003DMG400002324	PGSC0003DMP400004144
PGSC0003DMT400005987	PGSC0003DMG400002327	PGSC0003DMP400004153
PGSC0003DMT400005990	PGSC0003DMG400002328	PGSC0003DMP400004156
PGSC0003DMT400006002	PGSC0003DMG400002334	PGSC0003DMP400004163
PGSC0003DMT400006010	PGSC0003DMG400002336	PGSC0003DMP400004167
PGSC0003DMT400006023	PGSC0003DMG400002340	PGSC0003DMP400004180
PGSC0003DMT400006028	PGSC0003DMG400002342	PGSC0003DMP400004183
PGSC0003DMT400006032	PGSC0003DMG400002344	PGSC0003DMP400004186
PGSC0003DMT400006034	PGSC0003DMG400002345	PGSC0003DMP400004188
PGSC0003DMT400006035	PGSC0003DMG400002346	PGSC0003DMP400004189
PGSC0003DMT400006036	PGSC0003DMG400002347	PGSC0003DMP400004190
PGSC0003DMT400006038	PGSC0003DMG401002349	PGSC0003DMP400004191
PGSC0003DMT400006040	PGSC0003DMG402002349	PGSC0003DMP400004192
PGSC0003DMT400006041	PGSC0003DMG400002350	PGSC0003DMP400004193
PGSC0003DMT400006042	PGSC0003DMG400002351	PGSC0003DMP400004194
PGSC0003DMT400006050	PGSC0003DMG400002352	PGSC0003DMP400004202
PGSC0003DMT400006053	PGSC0003DMG400002353	PGSC0003DMP400004204
PGSC0003DMT400006056	PGSC0003DMG400002354	PGSC0003DMP400004205
PGSC0003DMT400006075	PGSC0003DMG400002359	PGSC0003DMP400004212
PGSC0003DMT400006082	PGSC0003DMG400002362	PGSC0003DMP400004214
PGSC0003DMT400006086	PGSC0003DMG400002364	PGSC0003DMP400004216
PGSC0003DMT400006089	PGSC0003DMG400002366	PGSC0003DMP400004217
PGSC0003DMT400006095	PGSC0003DMG400002367	PGSC0003DMP400004223
PGSC0003DMT400006097	PGSC0003DMG401002368	PGSC0003DMP400004225
PGSC0003DMT400006102	PGSC0003DMG402002368	PGSC0003DMP400004228
PGSC0003DMT400006104	PGSC0003DMG400002370	PGSC0003DMP400004229
PGSC0003DMT400006110	PGSC0003DMG400002373	PGSC0003DMP400004232
PGSC0003DMT400006113	PGSC0003DMG400002375	PGSC0003DMP400004235
PGSC0003DMT400006114	PGSC0003DMG400002376	PGSC0003DMP400004236
PGSC0003DMT400006124	PGSC0003DMG400002381	PGSC0003DMP400004242
PGSC0003DMT400006126	PGSC0003DMG400002383	PGSC0003DMP400004244
PGSC0003DMT400006132	PGSC0003DMG400002386	PGSC0003DMP400004247
PGSC0003DMT400006135	PGSC0003DMG400002387	PGSC0003DMP400004250
PGSC0003DMT400006139	PGSC0003DMG400002388	PGSC0003DMP400004254
PGSC0003DMT400006140	PGSC0003DMG400002389	PGSC0003DMP400004255
PGSC0003DMT400006144	PGSC0003DMG400002390	PGSC0003DMP400004258
PGSC0003DMT400006151	PGSC0003DMG400002392	PGSC0003DMP400004262
PGSC0003DMT400006155	PGSC0003DMG400002394	PGSC0003DMP400004266
PGSC0003DMT400006161	PGSC0003DMG400002396	PGSC0003DMP400004268
PGSC0003DMT400006164	PGSC0003DMG401002397	PGSC0003DMP400004271
PGSC0003DMT400006166	PGSC0003DMG402002397	PGSC0003DMP400004272
PGSC0003DMT400006168	PGSC0003DMG400002398	PGSC0003DMP400004274
PGSC0003DMT400006173	PGSC0003DMG400002400	PGSC0003DMP400004277
PGSC0003DMT400006174	PGSC0003DMG400002401	PGSC0003DMP400004278
PGSC0003DMT400006183	PGSC0003DMG400002405	PGSC0003DMP400004281
PGSC0003DMT400006190	PGSC0003DMG400002408	PGSC0003DMP400004284
PGSC0003DMT400006199	PGSC0003DMG400002411	PGSC0003DMP400004286
PGSC0003DMT400006202	PGSC0003DMG400002412	PGSC0003DMP400004288
PGSC0003DMT400006208	PGSC0003DMG400002414	PGSC0003DMP400004292
PGSC0003DMT400006214	PGSC0003DMG400002417	PGSC0003DMP400004296
PGSC0003DMT400006218	PGSC0003DMG400002420	PGSC0003DMP400004298
PGSC0003DMT400006219	PGSC0003DMG401002421	PGSC0003DMP400004299
PGSC0003DMT400006220	PGSC0003DMG402002421	PGSC0003DMP400004300
PGSC0003DMT400006221	PGSC0003DMG400002422	PGSC0003DMP400004301
PGSC0003DMT400006229	PGSC0003DMG400002426	PGSC0003DMP400004305
PGSC0003DMT400006232	PGSC0003DMG400002427	PGSC0003DMP400004308
PGSC0003DMT400006233	PGSC0003DMG401002428	PGSC0003DMP400004309
PGSC0003DMT400006234	PGSC0003DMG402002428	PGSC0003DMP400004310
PGSC0003DMT400006249	PGSC0003DMG400002435	PGSC0003DMP400004317
PGSC0003DMT400006256	PGSC0003DMG400002438	PGSC0003DMP400004323
PGSC0003DMT400006261	PGSC0003DMG400002440	PGSC0003DMP400004328
PGSC0003DMT400006264	PGSC0003DMG400002442	PGSC0003DMP400004330
PGSC0003DMT400006269	PGSC0003DMG400002445	PGSC0003DMP400004332
PGSC0003DMT400006272	PGSC0003DMG400002447	PGSC0003DMP400004334
PGSC0003DMT400006275	PGSC0003DMG400002448	PGSC0003DMP400004336
PGSC0003DMT400006276	PGSC0003DMG400002449	PGSC0003DMP400004337
PGSC0003DMT400006281	PGSC0003DMG400002452	PGSC0003DMP400004339
PGSC0003DMT400006285	PGSC0003DMG400002455	PGSC0003DMP400004342
PGSC0003DMT400006289	PGSC0003DMG400002456	PGSC0003DMP400004343
PGSC0003DMT400006290	PGSC0003DMG400002457	PGSC0003DMP400004344
PGSC0003DMT400006292	PGSC0003DMG400002458	PGSC0003DMP400004345
PGSC0003DMT400006305	PGSC0003DMG400002462	PGSC0003DMP400004353
PGSC0003DMT400006318	PGSC0003DMG400002467	PGSC0003DMP400004362
PGSC0003DMT400006323	PGSC0003DMG400002470	PGSC0003DMP400004367
PGSC0003DMT400006324	PGSC0003DMG400002471	PGSC0003DMP400004368
PGSC0003DMT400006325	PGSC0003DMG400002472	PGSC0003DMP400004369
PGSC0003DMT400006326	PGSC0003DMG400002473	PGSC0003DMP400004370
PGSC0003DMT400006328	PGSC0003DMG400002474	PGSC0003DMP400004371
PGSC0003DMT400006334	PGSC0003DMG400002477	PGSC0003DMP400004375
PGSC0003DMT400006337	PGSC0003DMG400002479	PGSC0003DMP400004377
PGSC0003DMT400006344	PGSC0003DMG400002481	PGSC0003DMP400004383
PGSC0003DMT400006346	PGSC0003DMG400002482	PGSC0003DMP400004385
PGSC0003DMT400006347	PGSC0003DMG400002483	PGSC0003DMP400004386
PGSC0003DMT400006360	PGSC0003DMG400002484	PGSC0003DMP400004391
PGSC0003DMT400006365	PGSC0003DMG400002485	PGSC0003DMP400004396
PGSC0003DMT400006366	PGSC0003DMG400002486	PGSC0003DMP400004397
PGSC0003DMT400006367	PGSC0003DMG400002487	PGSC0003DMP400004398
PGSC0003DMT400006368	PGSC0003DMG400002488	PGSC0003DMP400004399
PGSC0003DMT400006369	PGSC0003DMG400002489	PGSC0003DMP400004400
PGSC0003DMT400006371	PGSC0003DMG400002490	PGSC0003DMP400004401
PGSC0003DMT400006376	PGSC0003DMG400002492	PGSC0003DMP400004403
PGSC0003DMT400006378	PGSC0003DMG400002493	PGSC0003DMP400004405
PGSC0003DMT400006383	PGSC0003DMG400002494	PGSC0003DMP400004410
PGSC0003DMT400006386	PGSC0003DMG400002495	PGSC0003DMP400004413
PGSC0003DMT400006390	PGSC0003DMG400002497	PGSC0003DMP400004416
PGSC0003DMT400006393	PGSC0003DMG400002498	PGSC0003DMP400004419
PGSC0003DMT400006398	PGSC0003DMG400002499	PGSC0003DMP400004422
PGSC0003DMT400006402	PGSC0003DMG400002500	PGSC0003DMP400004425
PGSC0003DMT400006407	PGSC0003DMG400002502	PGSC0003DMP400004429
PGSC0003DMT400006408	PGSC0003DMG400002503	PGSC0003DMP400004430
PGSC0003DMT400006409	PGSC0003DMG400002504	PGSC0003DMP400004431
PGSC0003DMT400006410	PGSC0003DMG400002505	PGSC0003DMP400004432
PGSC0003DMT400006419	PGSC0003DMG400002506	PGSC0003DMP400004434
PGSC0003DMT400006421	PGSC0003DMG400002507	PGSC0003DMP400004435
PGSC0003DMT400006422	PGSC0003DMG400002508	PGSC0003DMP400004436
PGSC0003DMT400006425	PGSC0003DMG400002509	PGSC0003DMP400004439
PGSC0003DMT400006431	PGSC0003DMG401002511	PGSC0003DMP400004443
PGSC0003DMT400006433	PGSC0003DMG402002511	PGSC0003DMP400004444
PGSC0003DMT400006434	PGSC0003DMG400002512	PGSC0003DMP400004445
PGSC0003DMT400006437	PGSC0003DMG400002513	PGSC0003DMP400004448
PGSC0003DMT400006442	PGSC0003DMG402002514	PGSC0003DMP400004452
PGSC0003DMT400006445	PGSC0003DMG401002514	PGSC0003DMP400004454
PGSC0003DMT400006452	PGSC0003DMG400002515	PGSC0003DMP400004457
PGSC0003DMT400006454	PGSC0003DMG401002516	PGSC0003DMP400004459
PGSC0003DMT400006455	PGSC0003DMG402002516	PGSC0003DMP400004460
PGSC0003DMT400006456	PGSC0003DMG400002517	PGSC0003DMP400004461
PGSC0003DMT400006458	PGSC0003DMG400002518	PGSC0003DMP400004463
PGSC0003DMT400006459	PGSC0003DMG400002519	PGSC0003DMP400004464
PGSC0003DMT400006461	PGSC0003DMG400002520	PGSC0003DMP400004466
PGSC0003DMT400006465	PGSC0003DMG400002521	PGSC0003DMP400004469
PGSC0003DMT400006469	PGSC0003DMG400002522	PGSC0003DMP400004473
PGSC0003DMT400006471	PGSC0003DMG400002523	PGSC0003DMP400004475
PGSC0003DMT400006472	PGSC0003DMG400002524	PGSC0003DMP400004476
PGSC0003DMT400006474	PGSC0003DMG400002525	PGSC0003DMP400004477
PGSC0003DMT400006475	PGSC0003DMG400002526	PGSC0003DMP400004478
PGSC0003DMT400006484	PGSC0003DMG400002527	PGSC0003DMP400004485
PGSC0003DMT400006485	PGSC0003DMG400002528	PGSC0003DMP400004486
PGSC0003DMT400006487	PGSC0003DMG400002529	PGSC0003DMP400004487
PGSC0003DMT400006489	PGSC0003DMG400002530	PGSC0003DMP400004489
PGSC0003DMT400006490	PGSC0003DMG400002531	PGSC0003DMP400004490
PGSC0003DMT400006491	PGSC0003DMG401002532	PGSC0003DMP400004491
PGSC0003DMT400006492	PGSC0003DMG402002532	PGSC0003DMP400004492
PGSC0003DMT400006494	PGSC0003DMG400002533	PGSC0003DMP400004494
PGSC0003DMT400006496	PGSC0003DMG400002534	PGSC0003DMP400004496
PGSC0003DMT400006497	PGSC0003DMG400002535	PGSC0003DMP400004497
PGSC0003DMT400006501	PGSC0003DMG400002537	PGSC0003DMP400004499
PGSC0003DMT400006502	PGSC0003DMG401002538	PGSC0003DMP400004500
PGSC0003DMT400006505	PGSC0003DMG402002538	PGSC0003DMP400004502
PGSC0003DMT400006508	PGSC0003DMG400002539	PGSC0003DMP400004504
PGSC0003DMT400006509	PGSC0003DMG401002540	PGSC0003DMP400004505
PGSC0003DMT400006511	PGSC0003DMG402002540	PGSC0003DMP400004506
PGSC0003DMT400006512	PGSC0003DMG400002541	PGSC0003DMP400004507
PGSC0003DMT400006515	PGSC0003DMG401002542	PGSC0003DMP400004510
PGSC0003DMT400006517	PGSC0003DMG402002542	PGSC0003DMP400004512
PGSC0003DMT400006523	PGSC0003DMG400002544	PGSC0003DMP400004517
PGSC0003DMT400006527	PGSC0003DMG400002545	PGSC0003DMP400004520
PGSC0003DMT400006531	PGSC0003DMG400002546	PGSC0003DMP400004524
PGSC0003DMT400006532	PGSC0003DMG400002547	PGSC0003DMP400004525
PGSC0003DMT400006535	PGSC0003DMG402002548	PGSC0003DMP400004528
PGSC0003DMT400006537	PGSC0003DMG401002548	PGSC0003DMP400004529
PGSC0003DMT400006545	PGSC0003DMG403002548	PGSC0003DMP400004535
PGSC0003DMT400006547	PGSC0003DMG400002549	PGSC0003DMP400004536
PGSC0003DMT400006548	PGSC0003DMG400002550	PGSC0003DMP400004537
PGSC0003DMT400006549	PGSC0003DMG401002551	PGSC0003DMP400004538
PGSC0003DMT400006557	PGSC0003DMG402002551	PGSC0003DMP400004545
PGSC0003DMT400006558	PGSC0003DMG400002552	PGSC0003DMP400004546
PGSC0003DMT400006560	PGSC0003DMG402002553	PGSC0003DMP400004548
PGSC0003DMT400006564	PGSC0003DMG401002553	PGSC0003DMP400004552
PGSC0003DMT400006569	PGSC0003DMG400002555	PGSC0003DMP400004555
PGSC0003DMT400006572	PGSC0003DMG400002556	PGSC0003DMP400004558
PGSC0003DMT400006578	PGSC0003DMG400002559	PGSC0003DMP400004564
PGSC0003DMT400006581	PGSC0003DMG400002560	PGSC0003DMP400004566
PGSC0003DMT400006583	PGSC0003DMG400002561	PGSC0003DMP400004568
PGSC0003DMT400006584	PGSC0003DMG400002562	PGSC0003DMP400004569
PGSC0003DMT400006585	PGSC0003DMG400002563	PGSC0003DMP400004570
PGSC0003DMT400006590	PGSC0003DMG400002564	PGSC0003DMP400004574
PGSC0003DMT400006592	PGSC0003DMG400002565	PGSC0003DMP400004576
PGSC0003DMT400006594	PGSC0003DMG400002566	PGSC0003DMP400004578
PGSC0003DMT400006598	PGSC0003DMG400002567	PGSC0003DMP400004579
PGSC0003DMT400006601	PGSC0003DMG400002568	PGSC0003DMP400004581
PGSC0003DMT400006604	PGSC0003DMG400002570	PGSC0003DMP400004583
PGSC0003DMT400006606	PGSC0003DMG400002572	PGSC0003DMP400004584
PGSC0003DMT400006608	PGSC0003DMG400002573	PGSC0003DMP400004586
PGSC0003DMT400006616	PGSC0003DMG400002574	PGSC0003DMP400004593
PGSC0003DMT400006617	PGSC0003DMG400002575	PGSC0003DMP400004594
PGSC0003DMT400006622	PGSC0003DMG400002576	PGSC0003DMP400004597
PGSC0003DMT400006625	PGSC0003DMG400002577	PGSC0003DMP400004599
PGSC0003DMT400006627	PGSC0003DMG400002578	PGSC0003DMP400004601
PGSC0003DMT400006628	PGSC0003DMG400002579	PGSC0003DMP400004602
PGSC0003DMT400006632	PGSC0003DMG400002580	PGSC0003DMP400004603
PGSC0003DMT400006633	PGSC0003DMG400002581	PGSC0003DMP400004604
PGSC0003DMT400006638	PGSC0003DMG400002582	PGSC0003DMP400004609
PGSC0003DMT400006639	PGSC0003DMG400002583	PGSC0003DMP400004610
PGSC0003DMT400006641	PGSC0003DMG400002584	PGSC0003DMP400004612
PGSC0003DMT400006642	PGSC0003DMG400002585	PGSC0003DMP400004613
PGSC0003DMT400006643	PGSC0003DMG400002586	PGSC0003DMP400004614
PGSC0003DMT400006646	PGSC0003DMG400002587	PGSC0003DMP400004616
PGSC0003DMT400006649	PGSC0003DMG400002589	PGSC0003DMP400004619
PGSC0003DMT400006654	PGSC0003DMG400002590	PGSC0003DMP400004621
PGSC0003DMT400006657	PGSC0003DMG400002591	PGSC0003DMP400004623
PGSC0003DMT400006661	PGSC0003DMG400002592	PGSC0003DMP400004626
PGSC0003DMT400006664	PGSC0003DMG400002593	PGSC0003DMP400004627
PGSC0003DMT400006680	PGSC0003DMG400002596	PGSC0003DMP400004638
PGSC0003DMT400006681	PGSC0003DMG400002597	PGSC0003DMP400004639
PGSC0003DMT400006682	PGSC0003DMG400002598	PGSC0003DMP400004640
PGSC0003DMT400006686	PGSC0003DMG402002599	PGSC0003DMP400004644
PGSC0003DMT400006689	PGSC0003DMG400002600	PGSC0003DMP400004647
PGSC0003DMT400006691	PGSC0003DMG400002601	PGSC0003DMP400004648
PGSC0003DMT400006698	PGSC0003DMG400002603	PGSC0003DMP400004650
PGSC0003DMT400006703	PGSC0003DMG401002606	PGSC0003DMP400004653
PGSC0003DMT400006706	PGSC0003DMG402002606	PGSC0003DMP400004656
PGSC0003DMT400006708	PGSC0003DMG400002607	PGSC0003DMP400004658
PGSC0003DMT400006709	PGSC0003DMG400002608	PGSC0003DMP400004659
PGSC0003DMT400006713	PGSC0003DMG400002609	PGSC0003DMP400004662
PGSC0003DMT400006719	PGSC0003DMG400002611	PGSC0003DMP400004668
PGSC0003DMT400006726	PGSC0003DMG400002612	PGSC0003DMP400004672
PGSC0003DMT400006729	PGSC0003DMG400002613	PGSC0003DMP400004674
PGSC0003DMT400006733	PGSC0003DMG400002614	PGSC0003DMP400004677
PGSC0003DMT400006734	PGSC0003DMG400002615	PGSC0003DMP400004678
PGSC0003DMT400006735	PGSC0003DMG400002616	PGSC0003DMP400004679
PGSC0003DMT400006741	PGSC0003DMG400002618	PGSC0003DMP400004683
PGSC0003DMT400006743	PGSC0003DMG400002619	PGSC0003DMP400004685
PGSC0003DMT400006751	PGSC0003DMG400002620	PGSC0003DMP400004686
PGSC0003DMT400006752	PGSC0003DMG400002621	PGSC0003DMP400004687
PGSC0003DMT400006756	PGSC0003DMG400002622	PGSC0003DMP400004690
PGSC0003DMT400006758	PGSC0003DMG401002623	PGSC0003DMP400004691
PGSC0003DMT400006760	PGSC0003DMG402002623	PGSC0003DMP400004693
PGSC0003DMT400006761	PGSC0003DMG400002624	PGSC0003DMP400004694
PGSC0003DMT400006768	PGSC0003DMG400002626	PGSC0003DMP400004699
PGSC0003DMT400006770	PGSC0003DMG400002627	PGSC0003DMP400004701
PGSC0003DMT400006782	PGSC0003DMG400002629	PGSC0003DMP400004712
PGSC0003DMT400006783	PGSC0003DMG400002630	PGSC0003DMP400004713
PGSC0003DMT400006784	PGSC0003DMG400002631	PGSC0003DMP400004714
PGSC0003DMT400006788	PGSC0003DMG400002632	PGSC0003DMP400004717
PGSC0003DMT400006793	PGSC0003DMG400002633	PGSC0003DMP400004720
PGSC0003DMT400006794	PGSC0003DMG400002634	PGSC0003DMP400004721
PGSC0003DMT400006796	PGSC0003DMG401002635	PGSC0003DMP400004723
PGSC0003DMT400006798	PGSC0003DMG402002635	PGSC0003DMP400004724
PGSC0003DMT400006800	PGSC0003DMG400002636	PGSC0003DMP400004726
PGSC0003DMT400006804	PGSC0003DMG400002638	PGSC0003DMP400004728
PGSC0003DMT400006808	PGSC0003DMG400002639	PGSC0003DMP400004729
PGSC0003DMT400006809	PGSC0003DMG401002640	PGSC0003DMP400004730
PGSC0003DMT400006811	PGSC0003DMG402002640	PGSC0003DMP400004732
PGSC0003DMT400006812	PGSC0003DMG400002641	PGSC0003DMP400004733
PGSC0003DMT400006820	PGSC0003DMG400002643	PGSC0003DMP400004740
PGSC0003DMT400006821	PGSC0003DMG400002644	PGSC0003DMP400004741
PGSC0003DMT400006822	PGSC0003DMG400002645	PGSC0003DMP400004742
PGSC0003DMT400006823	PGSC0003DMG400002646	PGSC0003DMP400004743
PGSC0003DMT400006825	PGSC0003DMG400002648	PGSC0003DMP400004744
PGSC0003DMT400006828	PGSC0003DMG400002651	PGSC0003DMP400004746
PGSC0003DMT400006829	PGSC0003DMG400002652	PGSC0003DMP400004747
PGSC0003DMT400006833	PGSC0003DMG401002654	PGSC0003DMP400004750
PGSC0003DMT400006847	PGSC0003DMG400002658	PGSC0003DMP400004760
PGSC0003DMT400006848	PGSC0003DMG401002659	PGSC0003DMP400004761
PGSC0003DMT400006849	PGSC0003DMG402002659	PGSC0003DMP400004762
PGSC0003DMT400006851	PGSC0003DMG400002660	PGSC0003DMP400004764
PGSC0003DMT400006854	PGSC0003DMG401002661	PGSC0003DMP400004765
PGSC0003DMT400006855	PGSC0003DMG402002661	PGSC0003DMP400004766
PGSC0003DMT400006858	PGSC0003DMG400002662	PGSC0003DMP400004769
PGSC0003DMT400006861	PGSC0003DMG400002663	PGSC0003DMP400004770
PGSC0003DMT400006862	PGSC0003DMG400002664	PGSC0003DMP400004771
PGSC0003DMT400006867	PGSC0003DMG400002666	PGSC0003DMP400004774
PGSC0003DMT400006887	PGSC0003DMG400002671	PGSC0003DMP400004781
PGSC0003DMT400006891	PGSC0003DMG400002673	PGSC0003DMP400004783
PGSC0003DMT400006894	PGSC0003DMG400002675	PGSC0003DMP400004786
PGSC0003DMT400006901	PGSC0003DMG400002678	PGSC0003DMP400004790
PGSC0003DMT400006904	PGSC0003DMG400002679	PGSC0003DMP400004792
PGSC0003DMT400006908	PGSC0003DMG400002680	PGSC0003DMP400004794
PGSC0003DMT400006915	PGSC0003DMG400002682	PGSC0003DMP400004799
PGSC0003DMT400006917	PGSC0003DMG401002683	PGSC0003DMP400004801
PGSC0003DMT400006918	PGSC0003DMG402002683	PGSC0003DMP400004802
PGSC0003DMT400006927	PGSC0003DMG400002684	PGSC0003DMP400004809
PGSC0003DMT400006928	PGSC0003DMG401002685	PGSC0003DMP400004810
PGSC0003DMT400006935	PGSC0003DMG402002685	PGSC0003DMP400004812
PGSC0003DMT400006937	PGSC0003DMG400002686	PGSC0003DMP400004814
PGSC0003DMT400006940	PGSC0003DMG400002687	PGSC0003DMP400004817
PGSC0003DMT400006941	PGSC0003DMG400002688	PGSC0003DMP400004818
PGSC0003DMT400006944	PGSC0003DMG400002689	PGSC0003DMP400004821
PGSC0003DMT400006945	PGSC0003DMG400002690	PGSC0003DMP400004822
PGSC0003DMT400006947	PGSC0003DMG400002691	PGSC0003DMP400004824
PGSC0003DMT400006951	PGSC0003DMG400002693	PGSC0003DMP400004826
PGSC0003DMT400006953	PGSC0003DMG400002694	PGSC0003DMP400004828
PGSC0003DMT400006955	PGSC0003DMG400002696	PGSC0003DMP400004830
PGSC0003DMT400006957	PGSC0003DMG400002697	PGSC0003DMP400004831
PGSC0003DMT400006967	PGSC0003DMG401002698	PGSC0003DMP400004837
PGSC0003DMT400006971	PGSC0003DMG400002699	PGSC0003DMP400004838
PGSC0003DMT400006973	PGSC0003DMG401002701	PGSC0003DMP400004840
PGSC0003DMT400006974	PGSC0003DMG402002701	PGSC0003DMP400004841
PGSC0003DMT400006975	PGSC0003DMG403002701	PGSC0003DMP400004842
PGSC0003DMT400007000	PGSC0003DMG400002703	PGSC0003DMP400004854
PGSC0003DMT400007009	PGSC0003DMG400002707	PGSC0003DMP400004858
PGSC0003DMT400007012	PGSC0003DMG400002708	PGSC0003DMP400004861
PGSC0003DMT400007016	PGSC0003DMG400002710	PGSC0003DMP400004864
PGSC0003DMT400007017	PGSC0003DMG400002711	PGSC0003DMP400004865
PGSC0003DMT400007020	PGSC0003DMG400002713	PGSC0003DMP400004867
PGSC0003DMT400007022	PGSC0003DMG401002714	PGSC0003DMP400004869
PGSC0003DMT400007024	PGSC0003DMG402002714	PGSC0003DMP400004871
PGSC0003DMT400007029	PGSC0003DMG400002716	PGSC0003DMP400004875
PGSC0003DMT400007032	PGSC0003DMG400002717	PGSC0003DMP400004878
PGSC0003DMT400007038	PGSC0003DMG400002719	PGSC0003DMP400004883
PGSC0003DMT400007043	PGSC0003DMG400002720	PGSC0003DMP400004888
PGSC0003DMT400007046	PGSC0003DMG401002721	PGSC0003DMP400004891
PGSC0003DMT400007048	PGSC0003DMG402002721	PGSC0003DMP400004893
PGSC0003DMT400007050	PGSC0003DMG400002722	PGSC0003DMP400004895
PGSC0003DMT400007051	PGSC0003DMG400002723	PGSC0003DMP400004896
PGSC0003DMT400007053	PGSC0003DMG400002724	PGSC0003DMP400004897
PGSC0003DMT400007056	PGSC0003DMG400002725	PGSC0003DMP400004900
PGSC0003DMT400007058	PGSC0003DMG400002726	PGSC0003DMP400004902
PGSC0003DMT400007059	PGSC0003DMG400002727	PGSC0003DMP400004903
PGSC0003DMT400007060	PGSC0003DMG400002728	PGSC0003DMP400004904
PGSC0003DMT400007062	PGSC0003DMG400002729	PGSC0003DMP400004905
PGSC0003DMT400007068	PGSC0003DMG400002730	PGSC0003DMP400004908
PGSC0003DMT400007070	PGSC0003DMG400002731	PGSC0003DMP400004910
PGSC0003DMT400007071	PGSC0003DMG400002732	PGSC0003DMP400004911
PGSC0003DMT400007072	PGSC0003DMG400002733	PGSC0003DMP400004912
PGSC0003DMT400007079	PGSC0003DMG400002740	PGSC0003DMP400004916
PGSC0003DMT400007080	PGSC0003DMG400002741	PGSC0003DMP400004917
PGSC0003DMT400007084	PGSC0003DMG400002744	PGSC0003DMP400004918
PGSC0003DMT400007086	PGSC0003DMG400002745	PGSC0003DMP400004919
PGSC0003DMT400007087	PGSC0003DMG400002746	PGSC0003DMP400004920
PGSC0003DMT400007088	PGSC0003DMG400002747	PGSC0003DMP400004921
PGSC0003DMT400007091	PGSC0003DMG400002748	PGSC0003DMP400004922
PGSC0003DMT400007095	PGSC0003DMG400002749	PGSC0003DMP400004923
PGSC0003DMT400007105	PGSC0003DMG400002750	PGSC0003DMP400004928
PGSC0003DMT400007107	PGSC0003DMG400002751	PGSC0003DMP400004930
PGSC0003DMT400007108	PGSC0003DMG400002752	PGSC0003DMP400004931
PGSC0003DMT400007119	PGSC0003DMG400002754	PGSC0003DMP400004938
PGSC0003DMT400007122	PGSC0003DMG400002755	PGSC0003DMP400004939
PGSC0003DMT400007125	PGSC0003DMG400002756	PGSC0003DMP400004942
PGSC0003DMT400007129	PGSC0003DMG400002758	PGSC0003DMP400004945
PGSC0003DMT400007130	PGSC0003DMG400002759	PGSC0003DMP400004946
PGSC0003DMT400007134	PGSC0003DMG400002761	PGSC0003DMP400004949
PGSC0003DMT400007140	PGSC0003DMG400002762	PGSC0003DMP400004954
PGSC0003DMT400007146	PGSC0003DMG400002763	PGSC0003DMP400004958
PGSC0003DMT400007147	PGSC0003DMG400002764	PGSC0003DMP400004959
PGSC0003DMT400007150	PGSC0003DMG400002765	PGSC0003DMP400004962
PGSC0003DMT400007153	PGSC0003DMG400002766	PGSC0003DMP400004965
PGSC0003DMT400007157	PGSC0003DMG400002768	PGSC0003DMP400004968
PGSC0003DMT400007159	PGSC0003DMG400002769	PGSC0003DMP400004970
PGSC0003DMT400007163	PGSC0003DMG400002770	PGSC0003DMP400004974
PGSC0003DMT400007165	PGSC0003DMG402002771	PGSC0003DMP400004976
PGSC0003DMT400007166	PGSC0003DMG400002772	PGSC0003DMP400004977
PGSC0003DMT400007170	PGSC0003DMG400002773	PGSC0003DMP400004978
PGSC0003DMT400007171	PGSC0003DMG400002774	PGSC0003DMP400004979
PGSC0003DMT400007177	PGSC0003DMG400002776	PGSC0003DMP400004982
PGSC0003DMT400007182	PGSC0003DMG400002777	PGSC0003DMP400004984
PGSC0003DMT400007183	PGSC0003DMG400002778	PGSC0003DMP400004985
PGSC0003DMT400007185	PGSC0003DMG400002779	PGSC0003DMP400004986
PGSC0003DMT400007188	PGSC0003DMG400002781	PGSC0003DMP400004989
PGSC0003DMT400007189	PGSC0003DMG400002782	PGSC0003DMP400004990
PGSC0003DMT400007191	PGSC0003DMG400002783	PGSC0003DMP400004992
[truncated: 20,706 more rows]
